# Supplementary material for: FOXM1 regulates leukemia stem cell quiescence and survival in MLL-rearranged AML
Source: PubMed Central journal article supplement (PMC7026046; doi:10.1038/s41467-020-14590-9), 2020-02-17
Supplement: 41467_2020_14590_MOESM1_ESM.pdf [file 41467_2020_14590_MOESM1_ESM.pdf]

Supplementary Information

# **FOXM1 Regulates Leukemia Stem Cell Quiescence and Survival in MLL-Rearranged AML**

Sheng et al.

Table of contents:

Supplementary figures 1-11

Supplementary tables 1-2

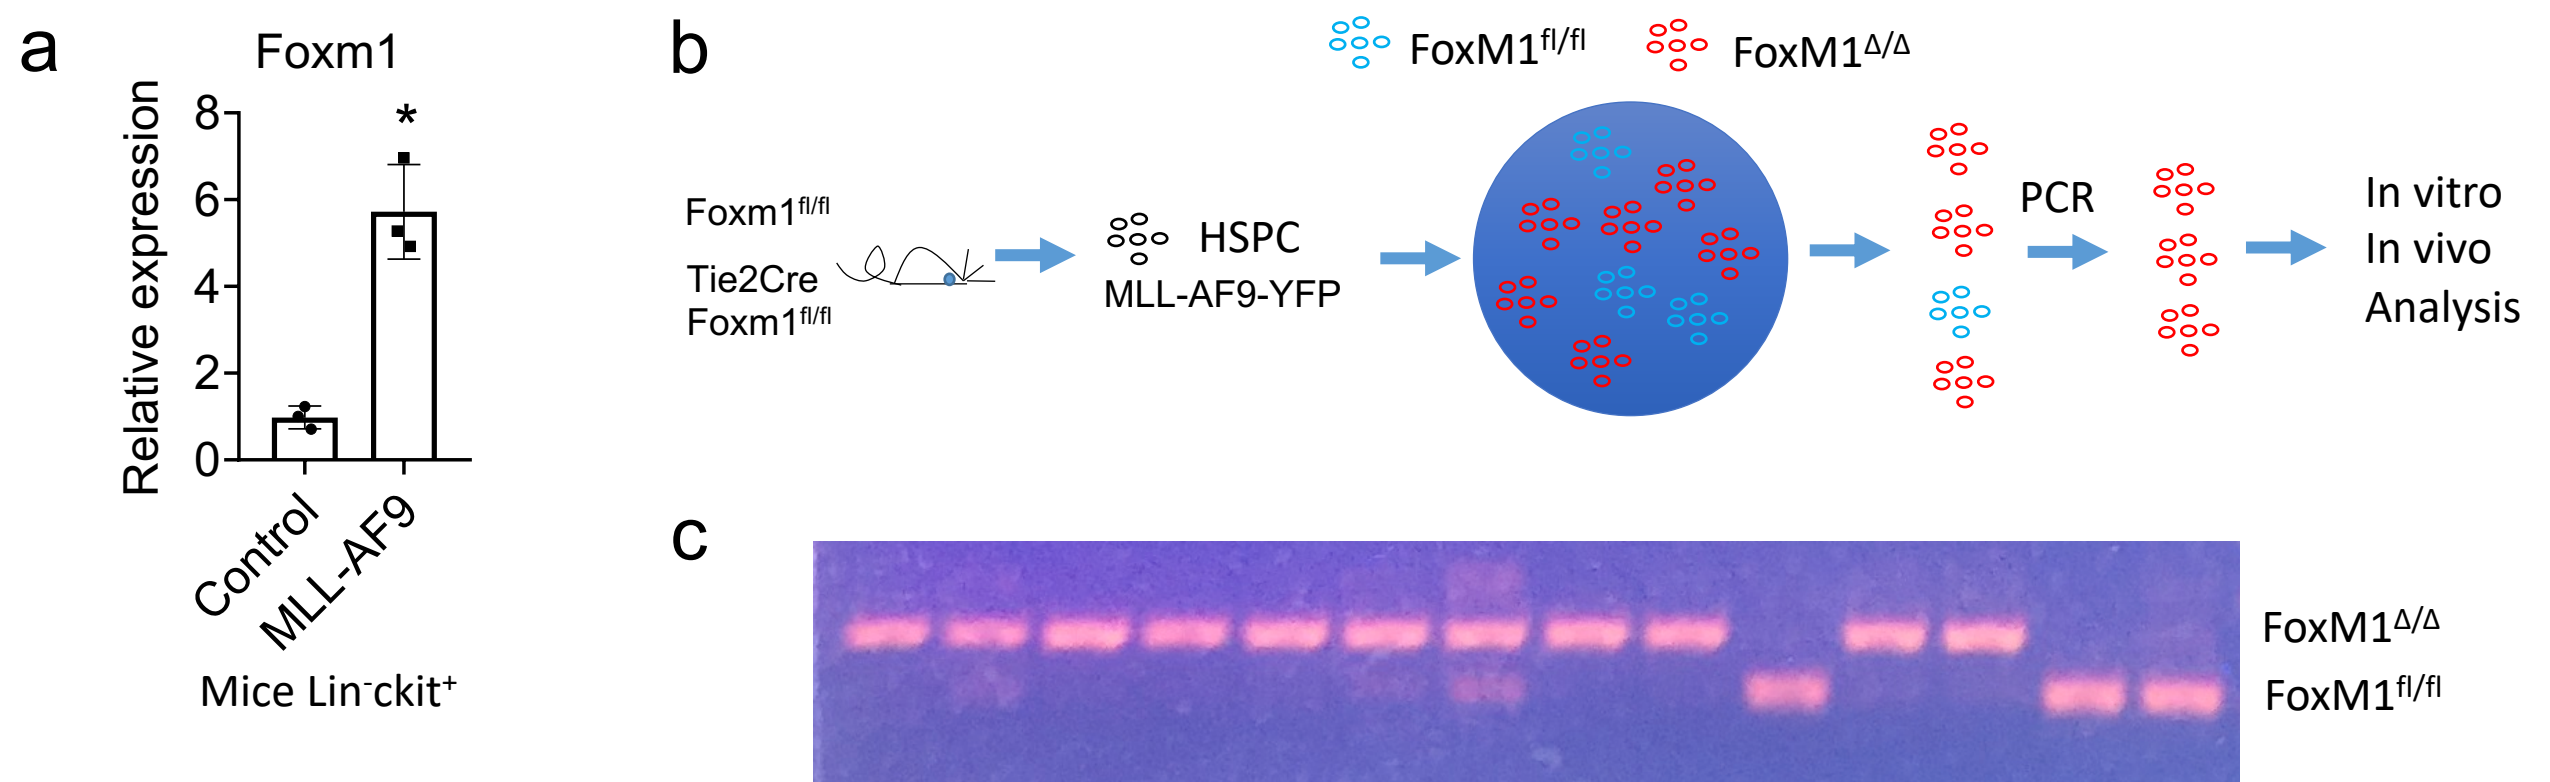

**Supplementary Fig. 1 Foxm1 deletion was incomplete in Tie2Cre-Foxm1 mice.**

(a) qPCR analysis of Foxm1 expression in mouse HSPCs, which were isolated from 6-8 weeks mice treated 5-Fu, infected with control plasmid or MLL-AF9-YFP. The average expression level of Foxm1 in control group was set as 1 for qPCR, n=3 mice for each group.

(b) Schematic diagram of selection of CFU-colonies with complete Foxm1 deletion.

(c) PCR analysis of Foxm1 deletion in single colonies from Methylcellulose medium.

\*p < 0.05, mean ± s.d., t-test. Source data are provided as a Source Data file.

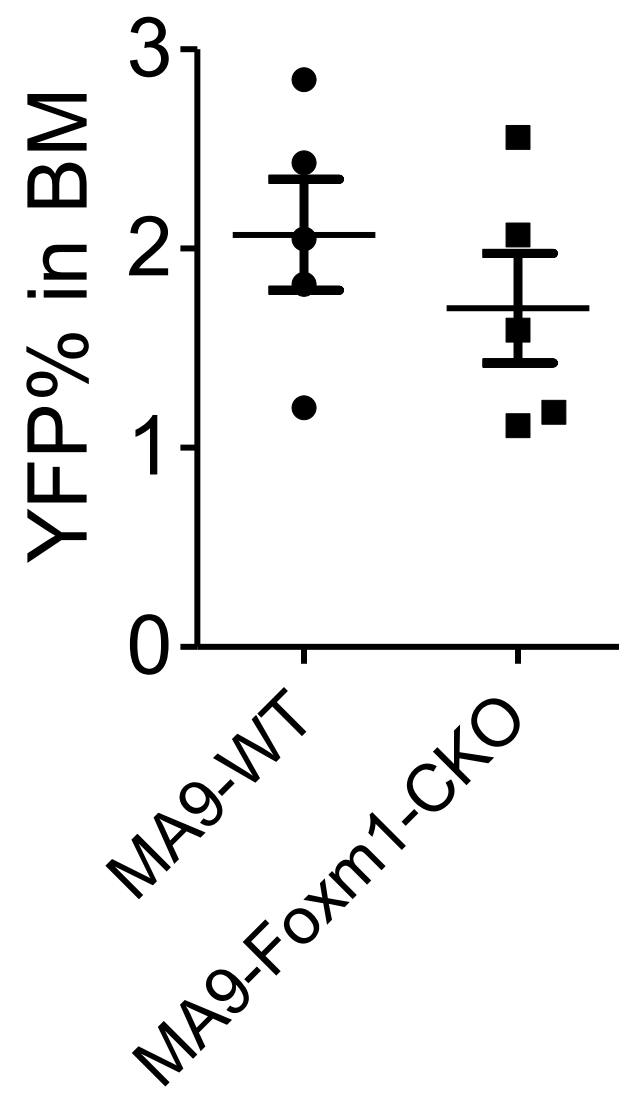

**Supplementary Fig. 2 Homing ability of Leukemia cells.**

MA9-Foxm1<sup>fl/fl</sup> or MA9-Foxm1-CKO cells were transplanted into lethally irradiated mice. The YFP+/leukemia cells in BM were determined by flow cytometric analysis 24 hours after transplantation, n=5 mice for each group, mean  $\pm$  s.d., t-test. Source data are provided as a Source Data file.

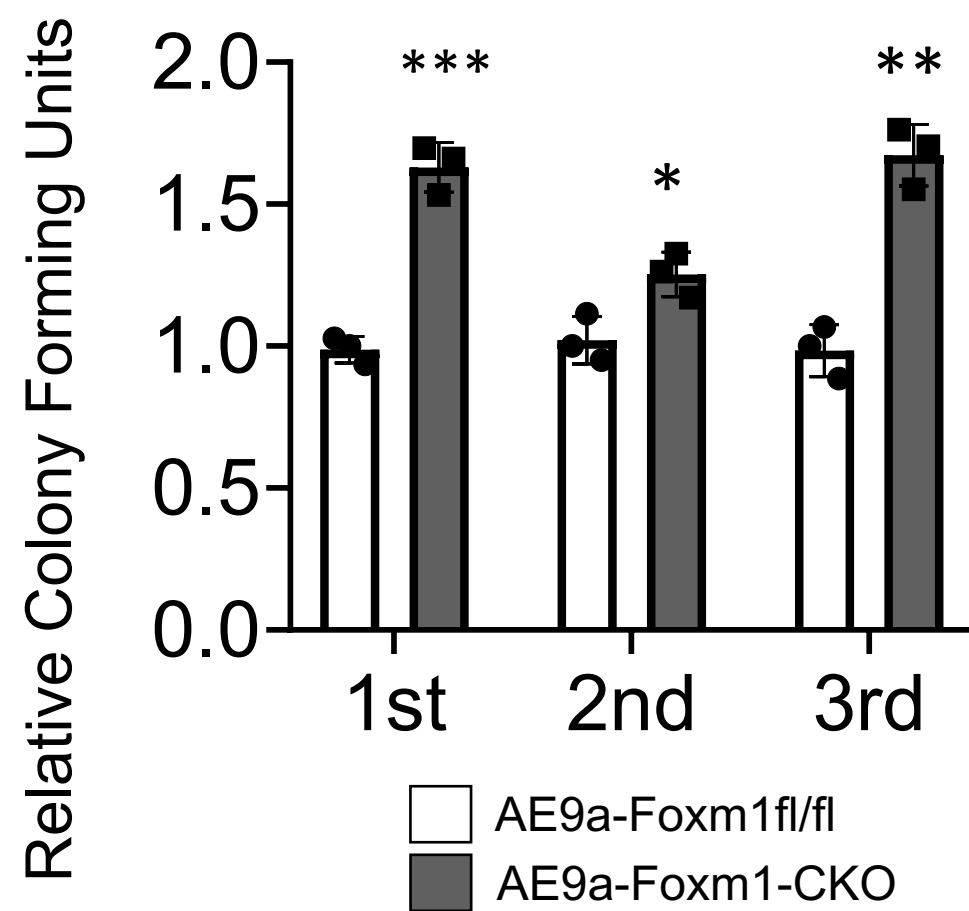

**Supplementary Fig. 3 Colony forming ability of AML1-ETO9a-transformed hematopoietic stem/progenitor cells with or without Foxm1 KO.**

The Lin<sup>-</sup> BM cells isolated from Foxm1<sup>fl/fl</sup> and Foxm1-CKO BM cells mice were infected with retrovirus expressing MSCV-Puro-GFP-AML1-ETO9a. The infected cells were plated in MethoCult™ medium containing cytokines in triplicate. The colonies were counted one week after plating, \* p<0.05; \*\*p<0.01 ; \*\*\*p<0.001, mean ± s.d., t-test. Source data are provided as a Source Data file.

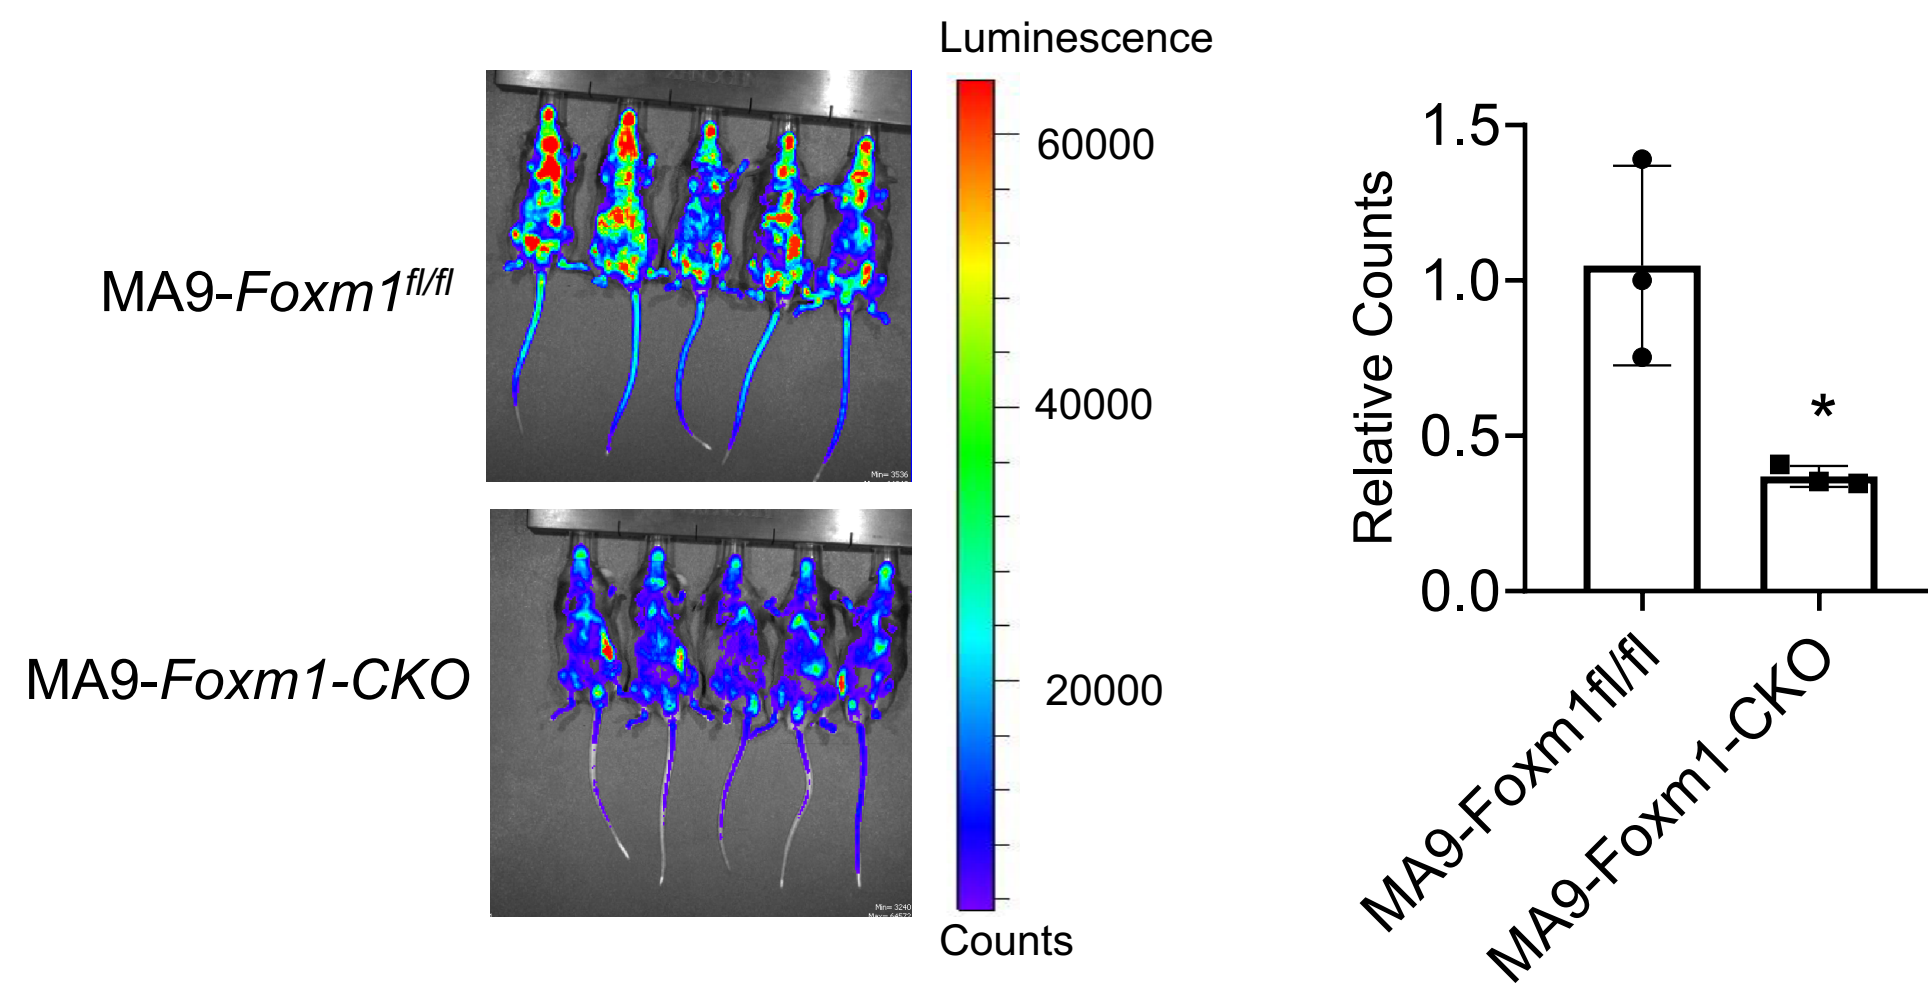

**Supplementary Fig. 4 Leukemia burden of primary leukemia mice.**

In vivo image system (IVIS) was used to determine the leukemia burden of primary MA9-Foxm1<sup>fl/fl</sup> or MA9-Foxm1-CKO recipient mice. BM cells were labeled with Luciferase and relative counts were shown. Mice were administrated substrate Luciferin before images were taken, n=3 mice for each group, \*p < 0.05, mean ± s.d., t-test. Source data are provided as a Source Data file.

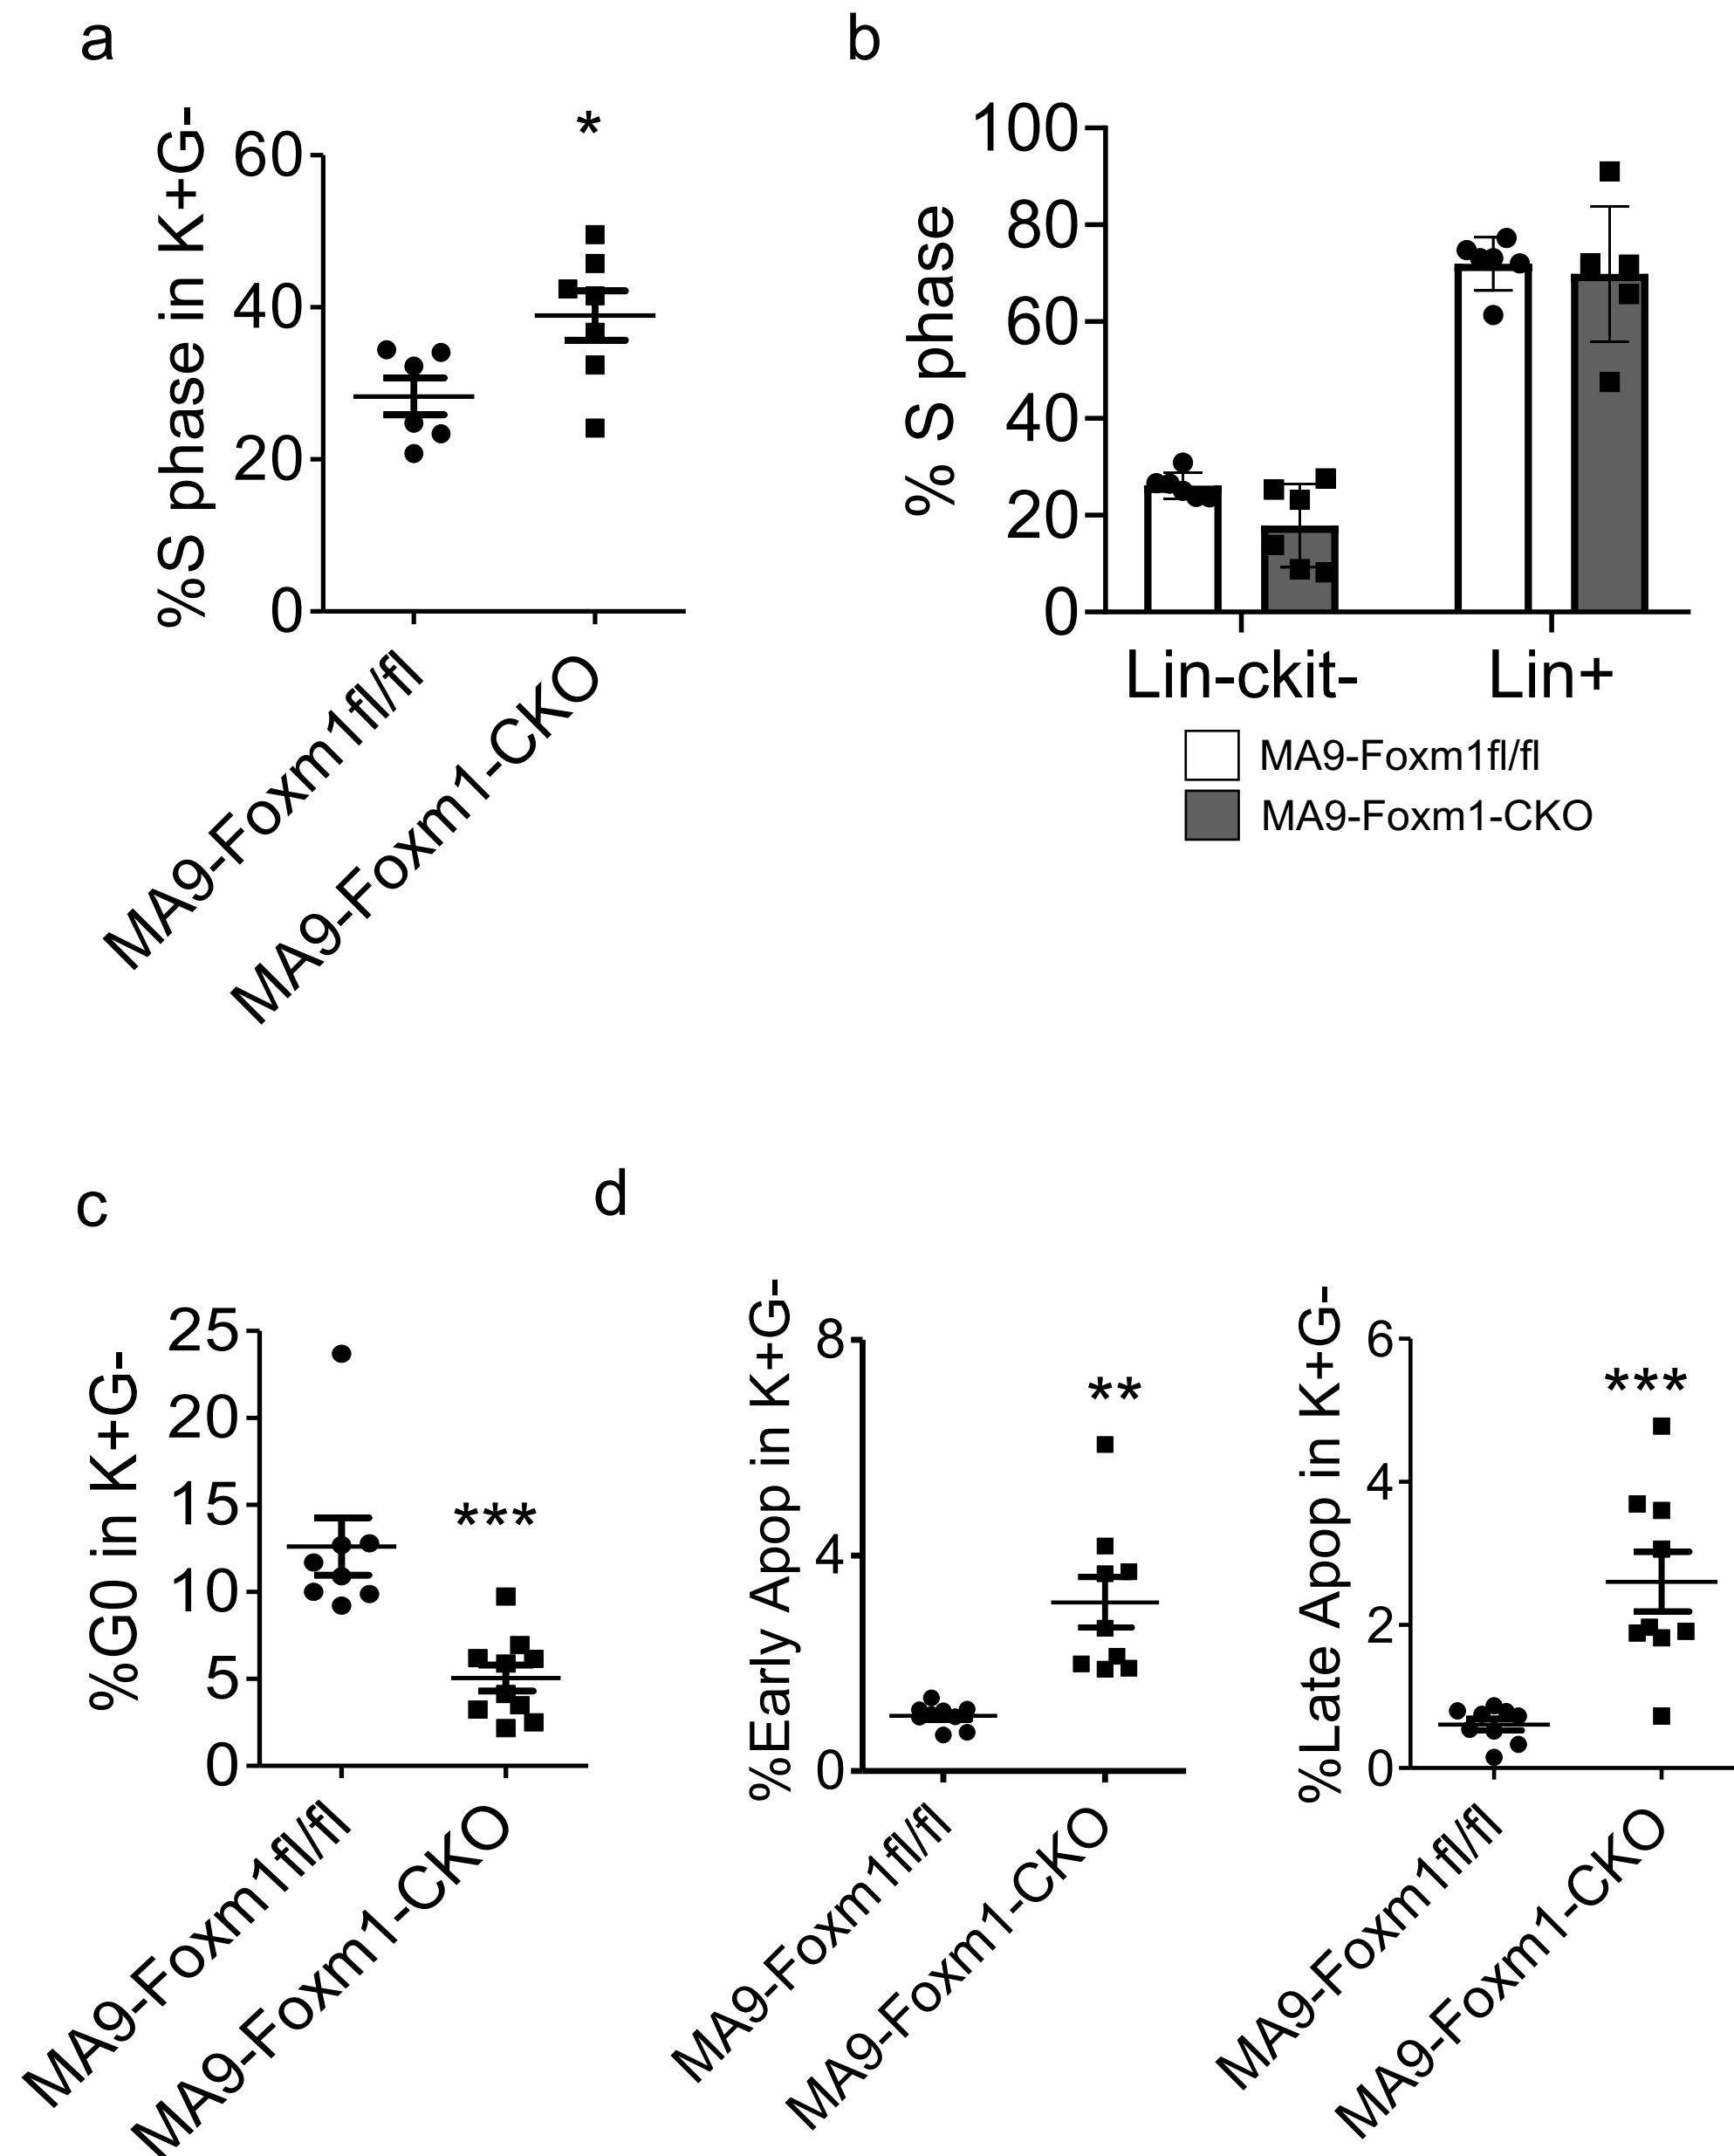

**Supplementary Fig. 5 Foxm1 regulates quiescence and survival of c-Kit<sup>+</sup>Gr1<sup>-</sup> cells.**

- (a) Flow cytometric analysis of cell cycle of c-Kit<sup>+</sup>Gr1<sup>-</sup> cells in MA9-Foxm1<sup>fl/fl</sup> (n=6 mice) or MA9-Foxm1-CKO primary mice (n=7 mice).
- (b) Flow cytometric analysis of cell cycle of Lin<sup>-</sup>c-Kit<sup>-</sup> and Lin<sup>+</sup> cells in MA9-Foxm1<sup>fl/fl</sup> or MA9-Foxm1-CKO primary mice, n=6 mice for each group.
- (c) Flow cytometric analysis of cell quiescence of c-Kit<sup>+</sup>Gr1<sup>-</sup> cells in MA9-Foxm1<sup>fl/fl</sup> (n=8 mice) or MA9-Foxm1-CKO primary mice (n=10 mice).
- (d) Flow cytometry analyzing the early and late apoptosis of c-Kit<sup>+</sup>Gr1<sup>-</sup> cells in MA9-Foxm1<sup>fl/fl</sup> or MA9-Foxm1-CKO primary mice, n=9 mice for each group.
- \*p < 0.05, \*\*p < 0.01, \*\*\*p < 0.001, mean ± s.d., t-test. Source data are provided as a Source Data file.

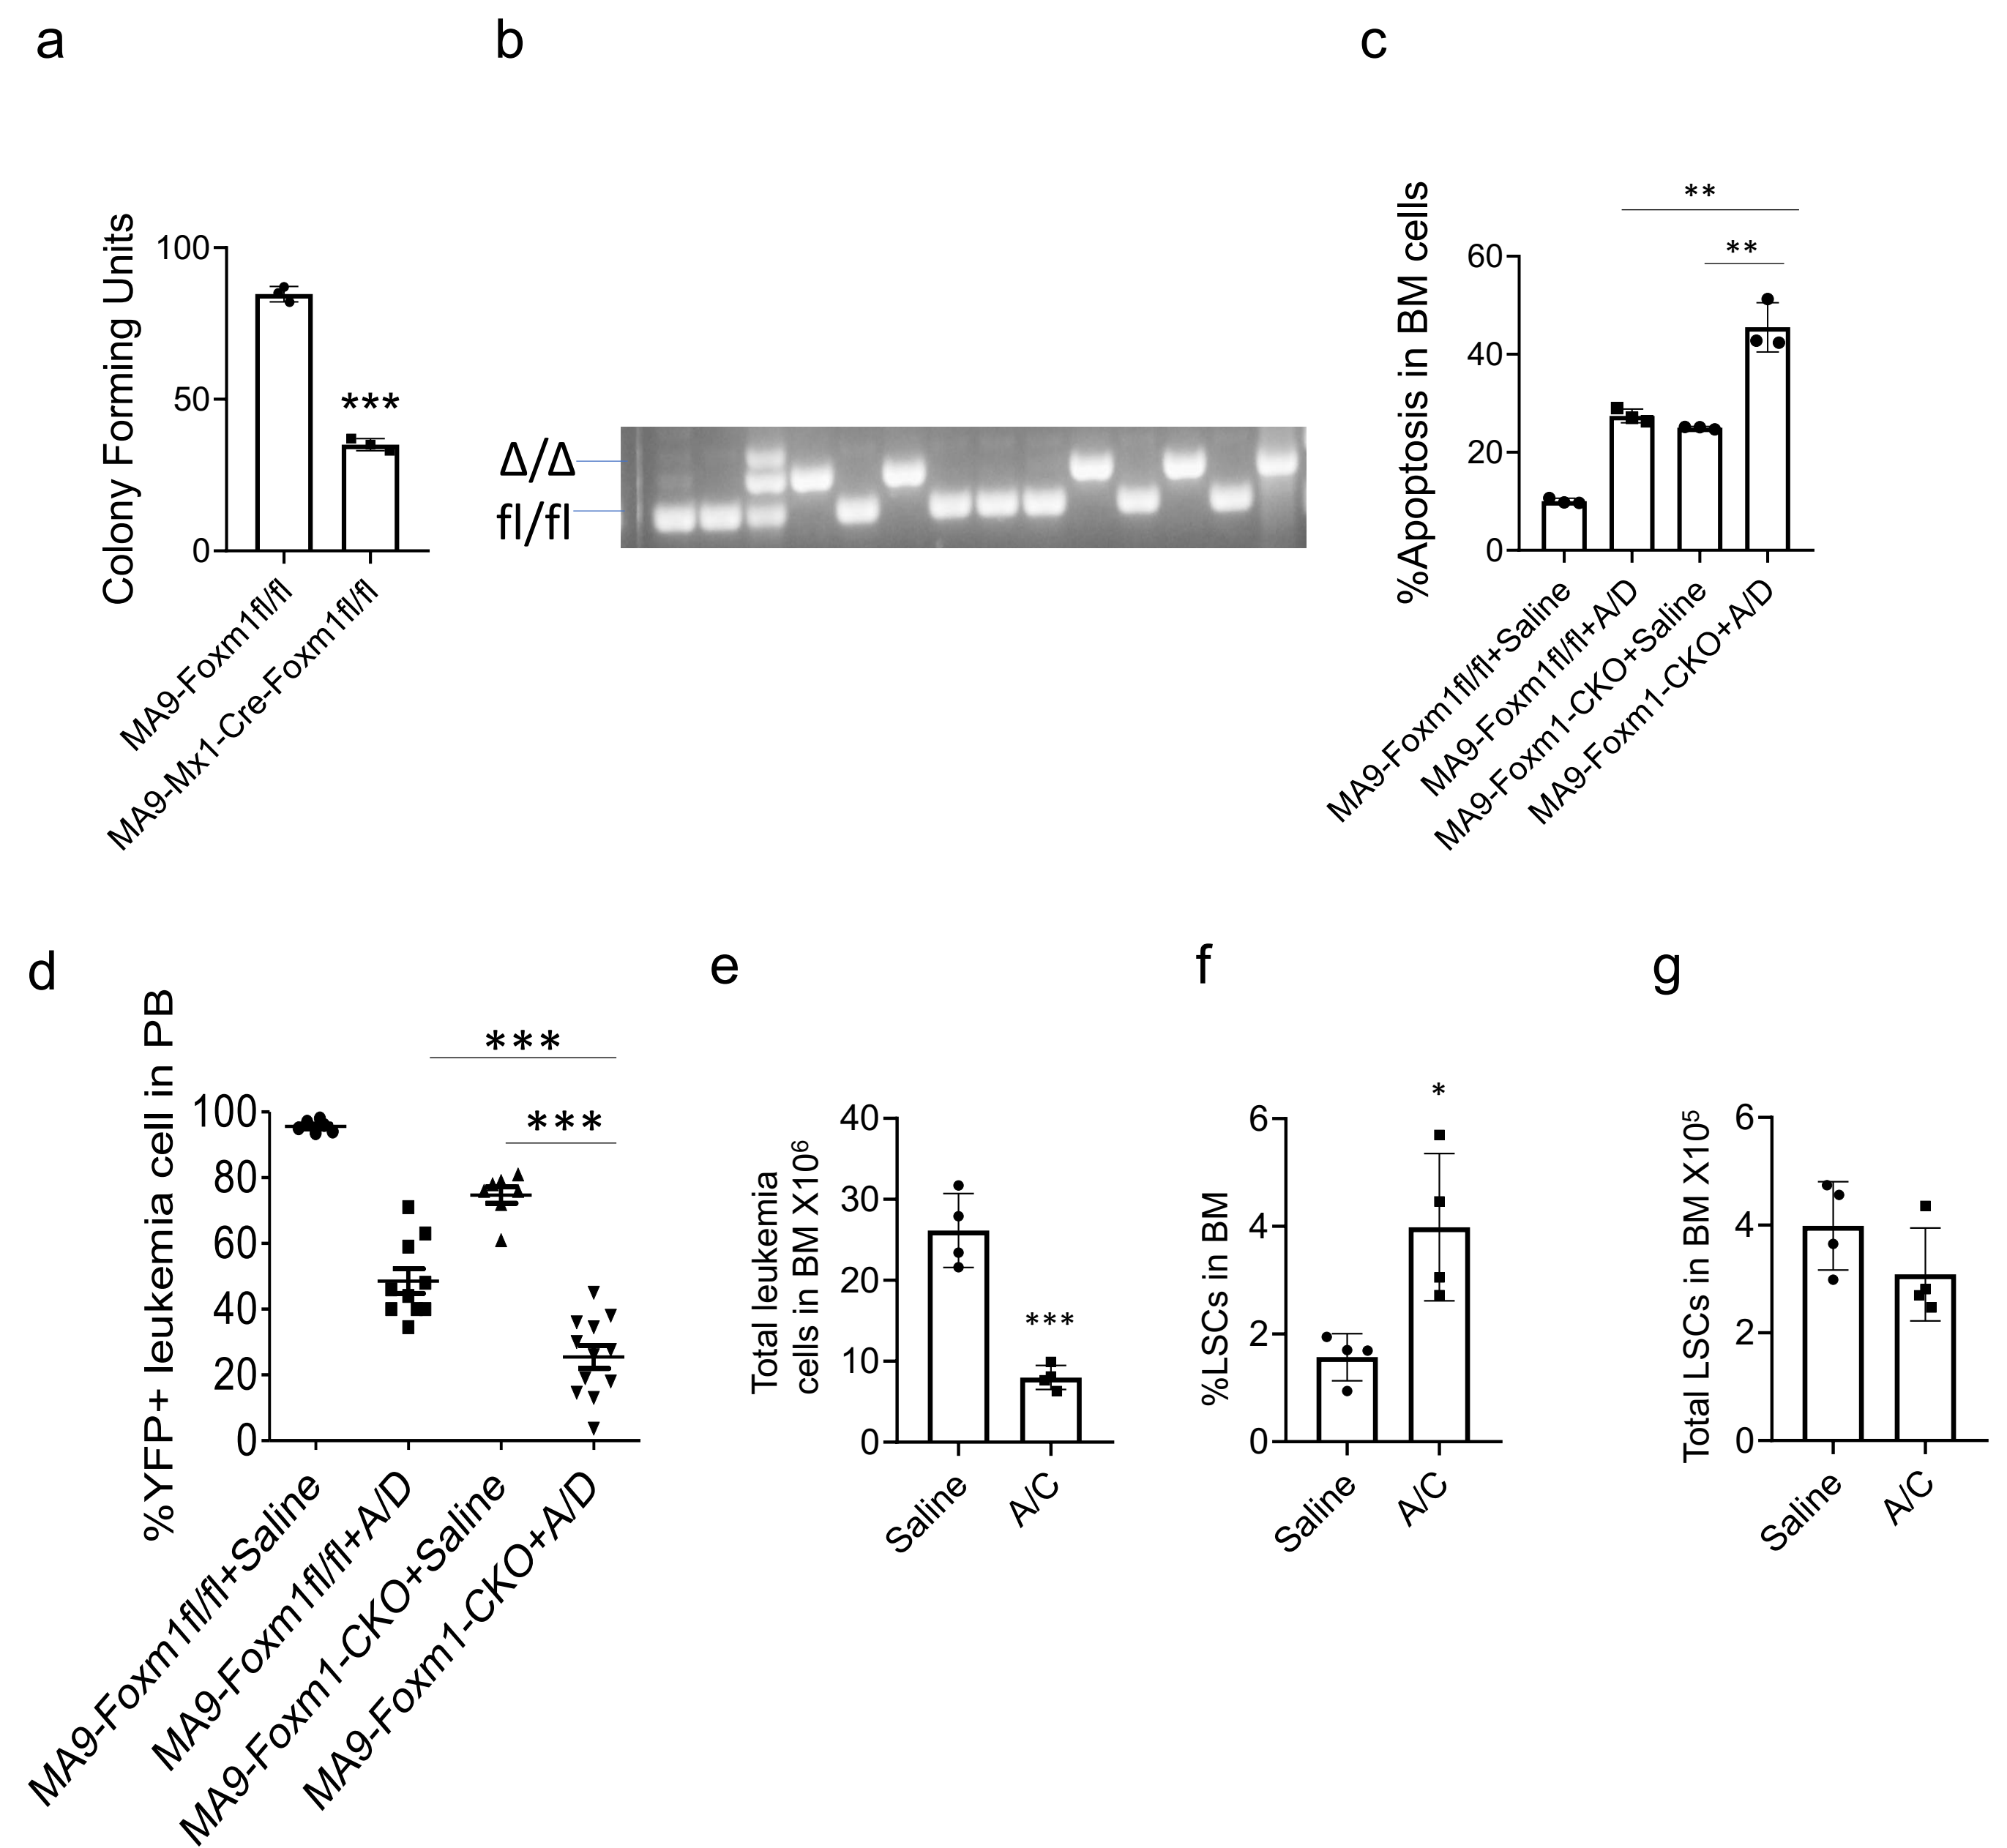

**Supplementary Fig. 6 Foxm1 loss increases the sensitivity of MA9-transformed LSCs to chemotherapeutic drugs.**

(a) Colony forming ability of MA9-Foxm1<sup>fl/fl</sup> or MA9-Mx1-CreFoxm1<sup>fl/fl</sup> BM cells from the primary recipient mice, n=3 mice for each group.

(b) PCR analysis of Foxm1 deletion in single colonies from Methylcellulose medium.

(c) Flow cytometric analysis of apoptosis rate in MA9-Foxm1<sup>fl/fl</sup> or MA9-Foxm1-CKO BM cells from primary recipient mice treated with Saline or 0.5 μM Cytarabine/15nM Doxorubicin (Ara-C/Doxo), n=3 mice for each group.

(d) Flow cytometric analysis of leukemia cell (YFP+) ratio in PB collected from the recipient mice, which were reconstituted with MA9-Foxm1<sup>fl/fl</sup> or MA9-Foxm1-CKO BM cells and treated with Saline or “5+3” regimen, Ara-C and DOXO (A/D), n=6 mice for of MA9-Foxm1<sup>fl/fl</sup> +Saline group; n=10 mice for of MA9-Foxm1<sup>fl/fl</sup> +A/D group; n=7 mice for of MA9-Foxm1-CKO +Saline group, n=12 mice for of MA9-Foxm1-CKO +A/D group.

(e) Total leukemic cell (YFP+) number in BM at one day after treatment with Saline or AraC/Doxo, n=4 mice for each group.

(f) LSC frequency in BM at one day after treatment with Saline or AraC/Doxo, n=4 mice for each group.

(g) Total LSC number in BM at one day after treatment with Saline or AraC/Doxo, n=4 mice for each group, \*p < 0.05, \*\*p < 0.01, \*\*\*p < 0.001, mean ± s.d., t-test. Source data are provided as a Source Data file.

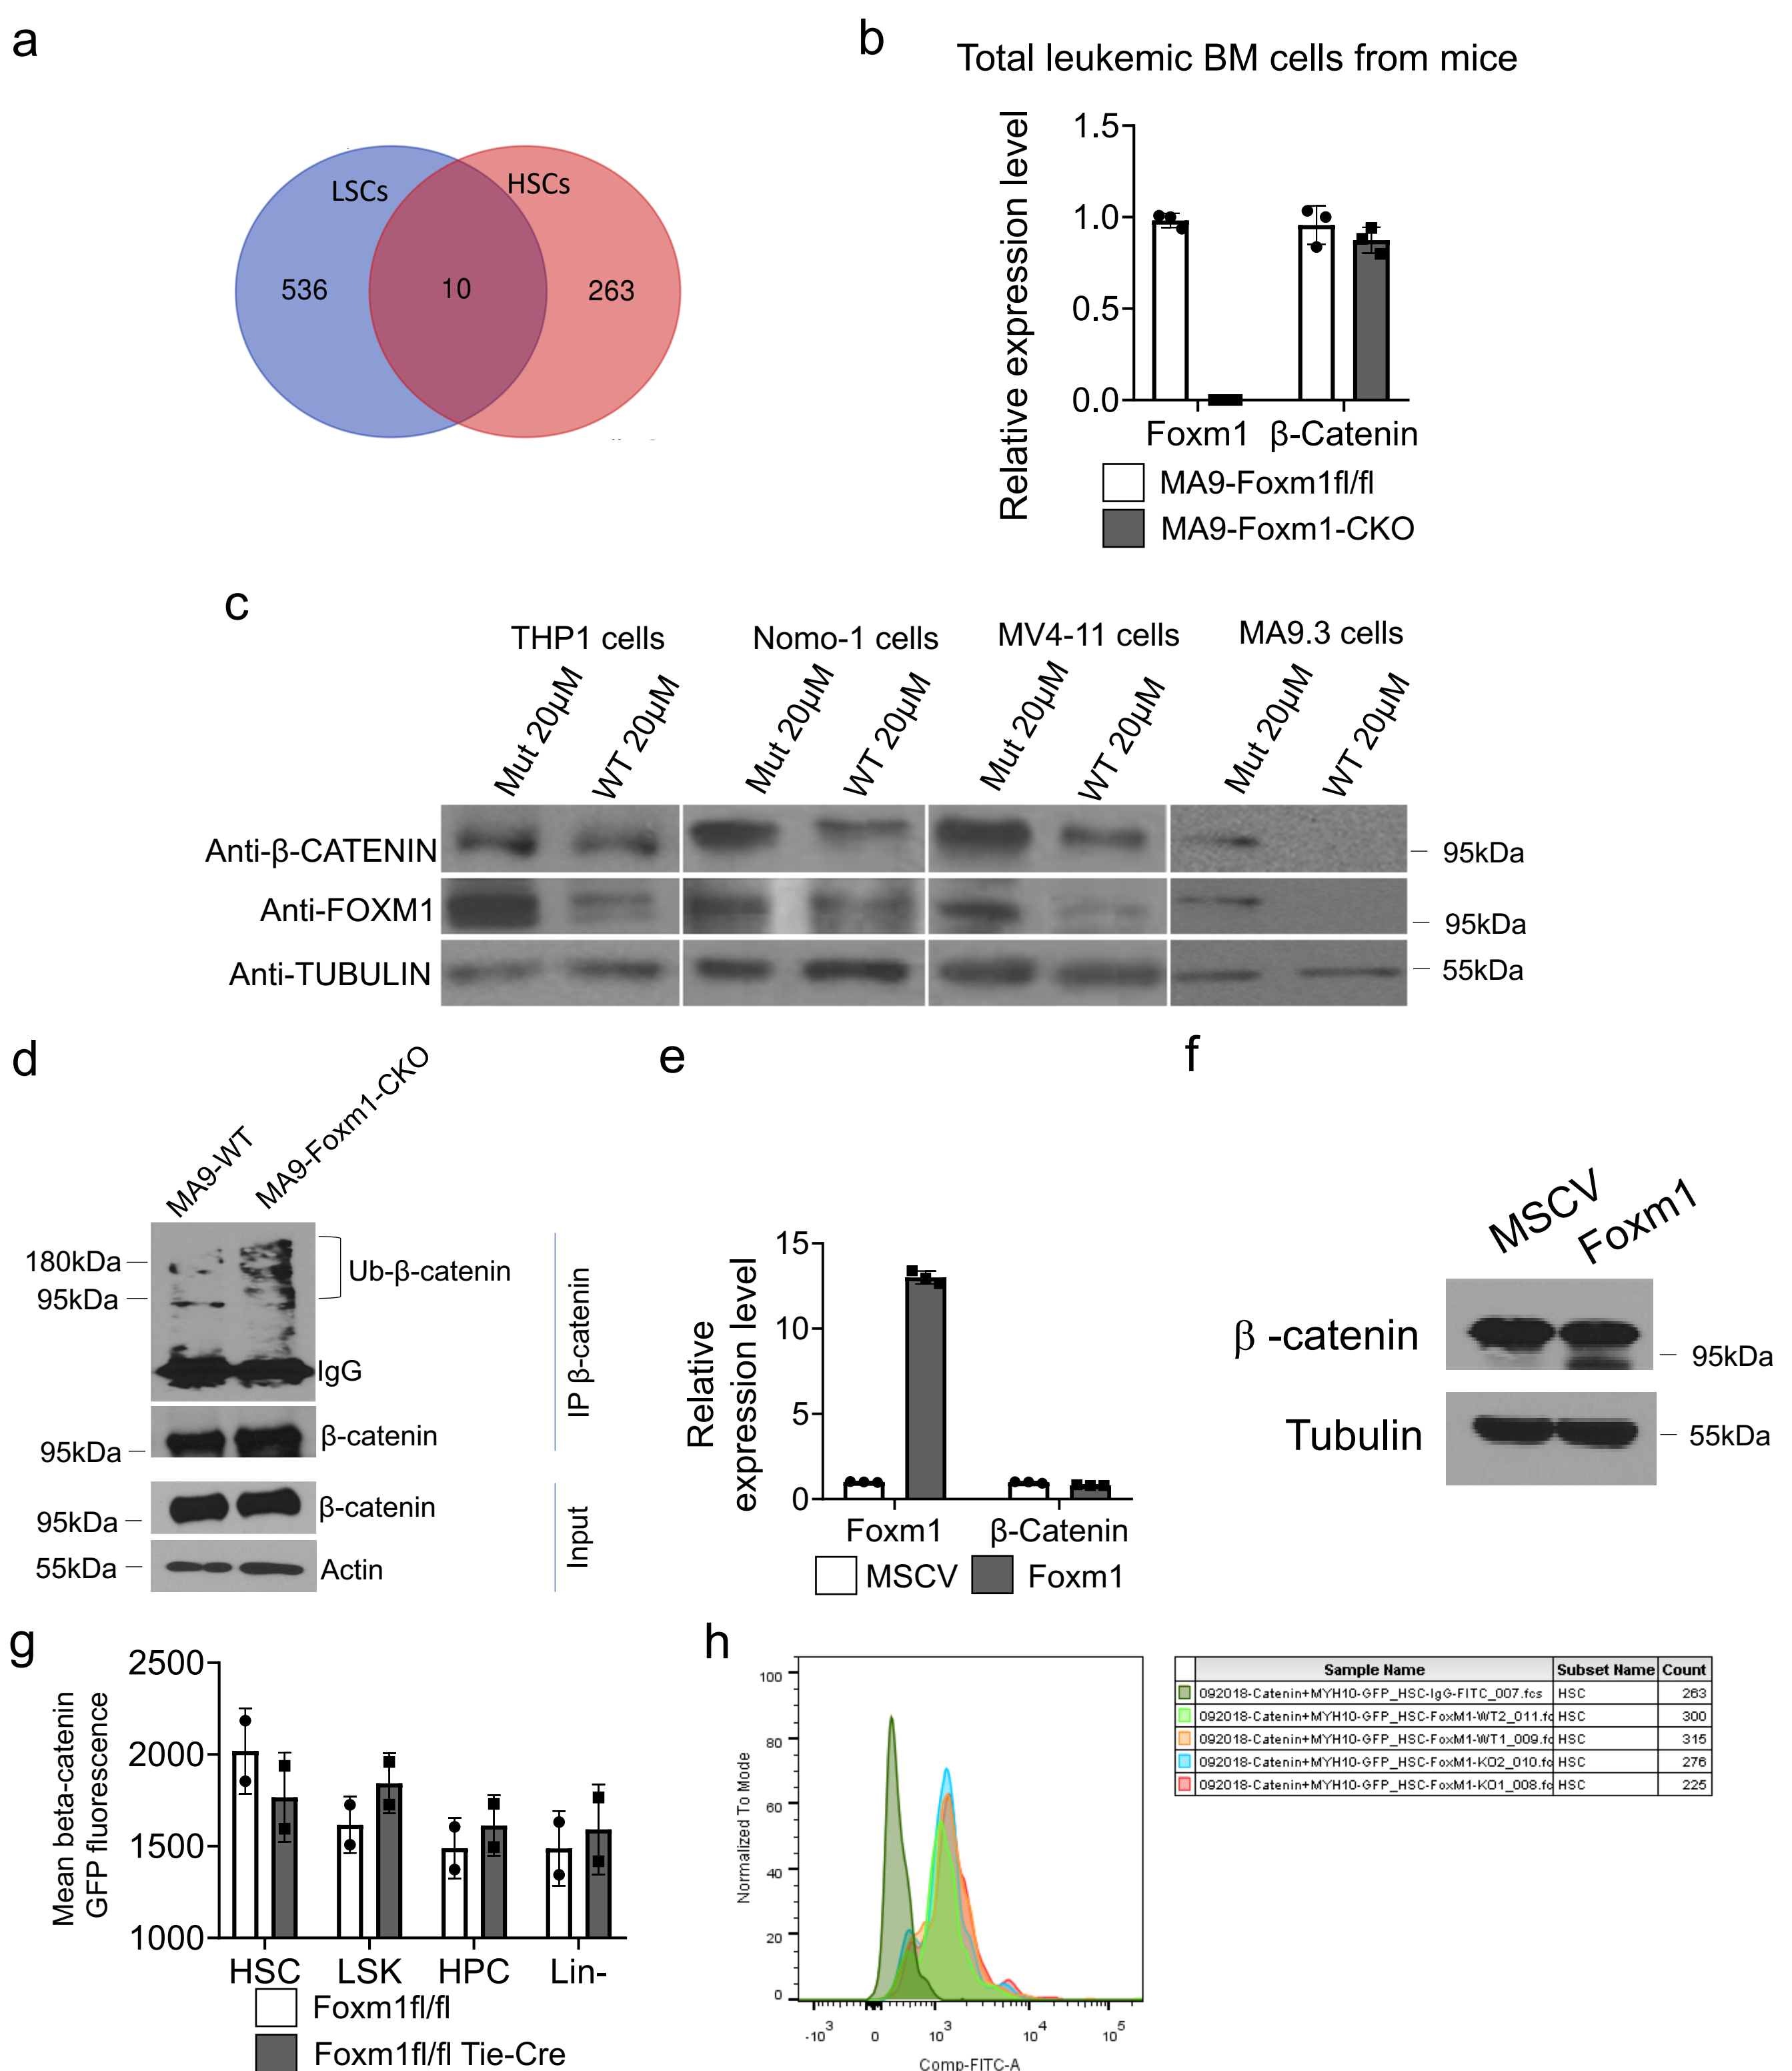

**Supplementary Fig. 7 FOXM1 interacts β-Catenin and regulates β-catenin expression in MLL-rearranged leukemia cells.**

(a) Venn diagram of differentially expressed genes in MA9-LSCs with or without presence of Foxm1 and HSCs with or without presence of Foxm1 gene.

(b) Relative expression of Foxm1 in total leukemic cells from MA9-Foxm1<sup>fl/fl</sup> and MA9-Foxm1-CKO, as determined by qRT-PCR. Results were normalized to those of Actb and are presented relative to those of Foxm1<sup>fl/fl</sup> control leukemic cells, n=3 mice for each group.

(c) Western Blot analysis of FOXM1 and β-CATENIN expression in human leukemia cells with expression of MLL fusion genes. The cells were treated with FOXM1-specific peptide or mutant peptide.

(d) The endogenous polyubiquitination of β-catenin was detected by anti-ubiquitin antibody in BM cells from MA9-Foxm1<sup>fl/fl</sup> and MA9-Foxm1-CKO. The cells were treated with 20μM MG-132 for six hours.

(e) Real-Time qPCR analysis of Foxm1 and β-Catenin expression level in mouse c-kit<sup>+</sup> cells expressed MSCV vector or MSCV-Foxm1, n=3 mice for each group.

(f) WB was used to determine β-Catenin protein level in mouse c-kit<sup>+</sup> cells expressed MSCV vector or MSCV-Foxm1.

(g-h) Intracellular flow cytometric analysis of β-Catenin protein level in Lin<sup>-</sup>, HPC, LSK and HSC population in Foxm1<sup>fl/fl</sup> or Foxm1<sup>fl/fl</sup> Tie2Cre mice, n=2 mice for each group. Summary data was shown in (g) and representing data was shown in (h).

Mean ± s.d., t-test. Source data are provided as a Source Data file.



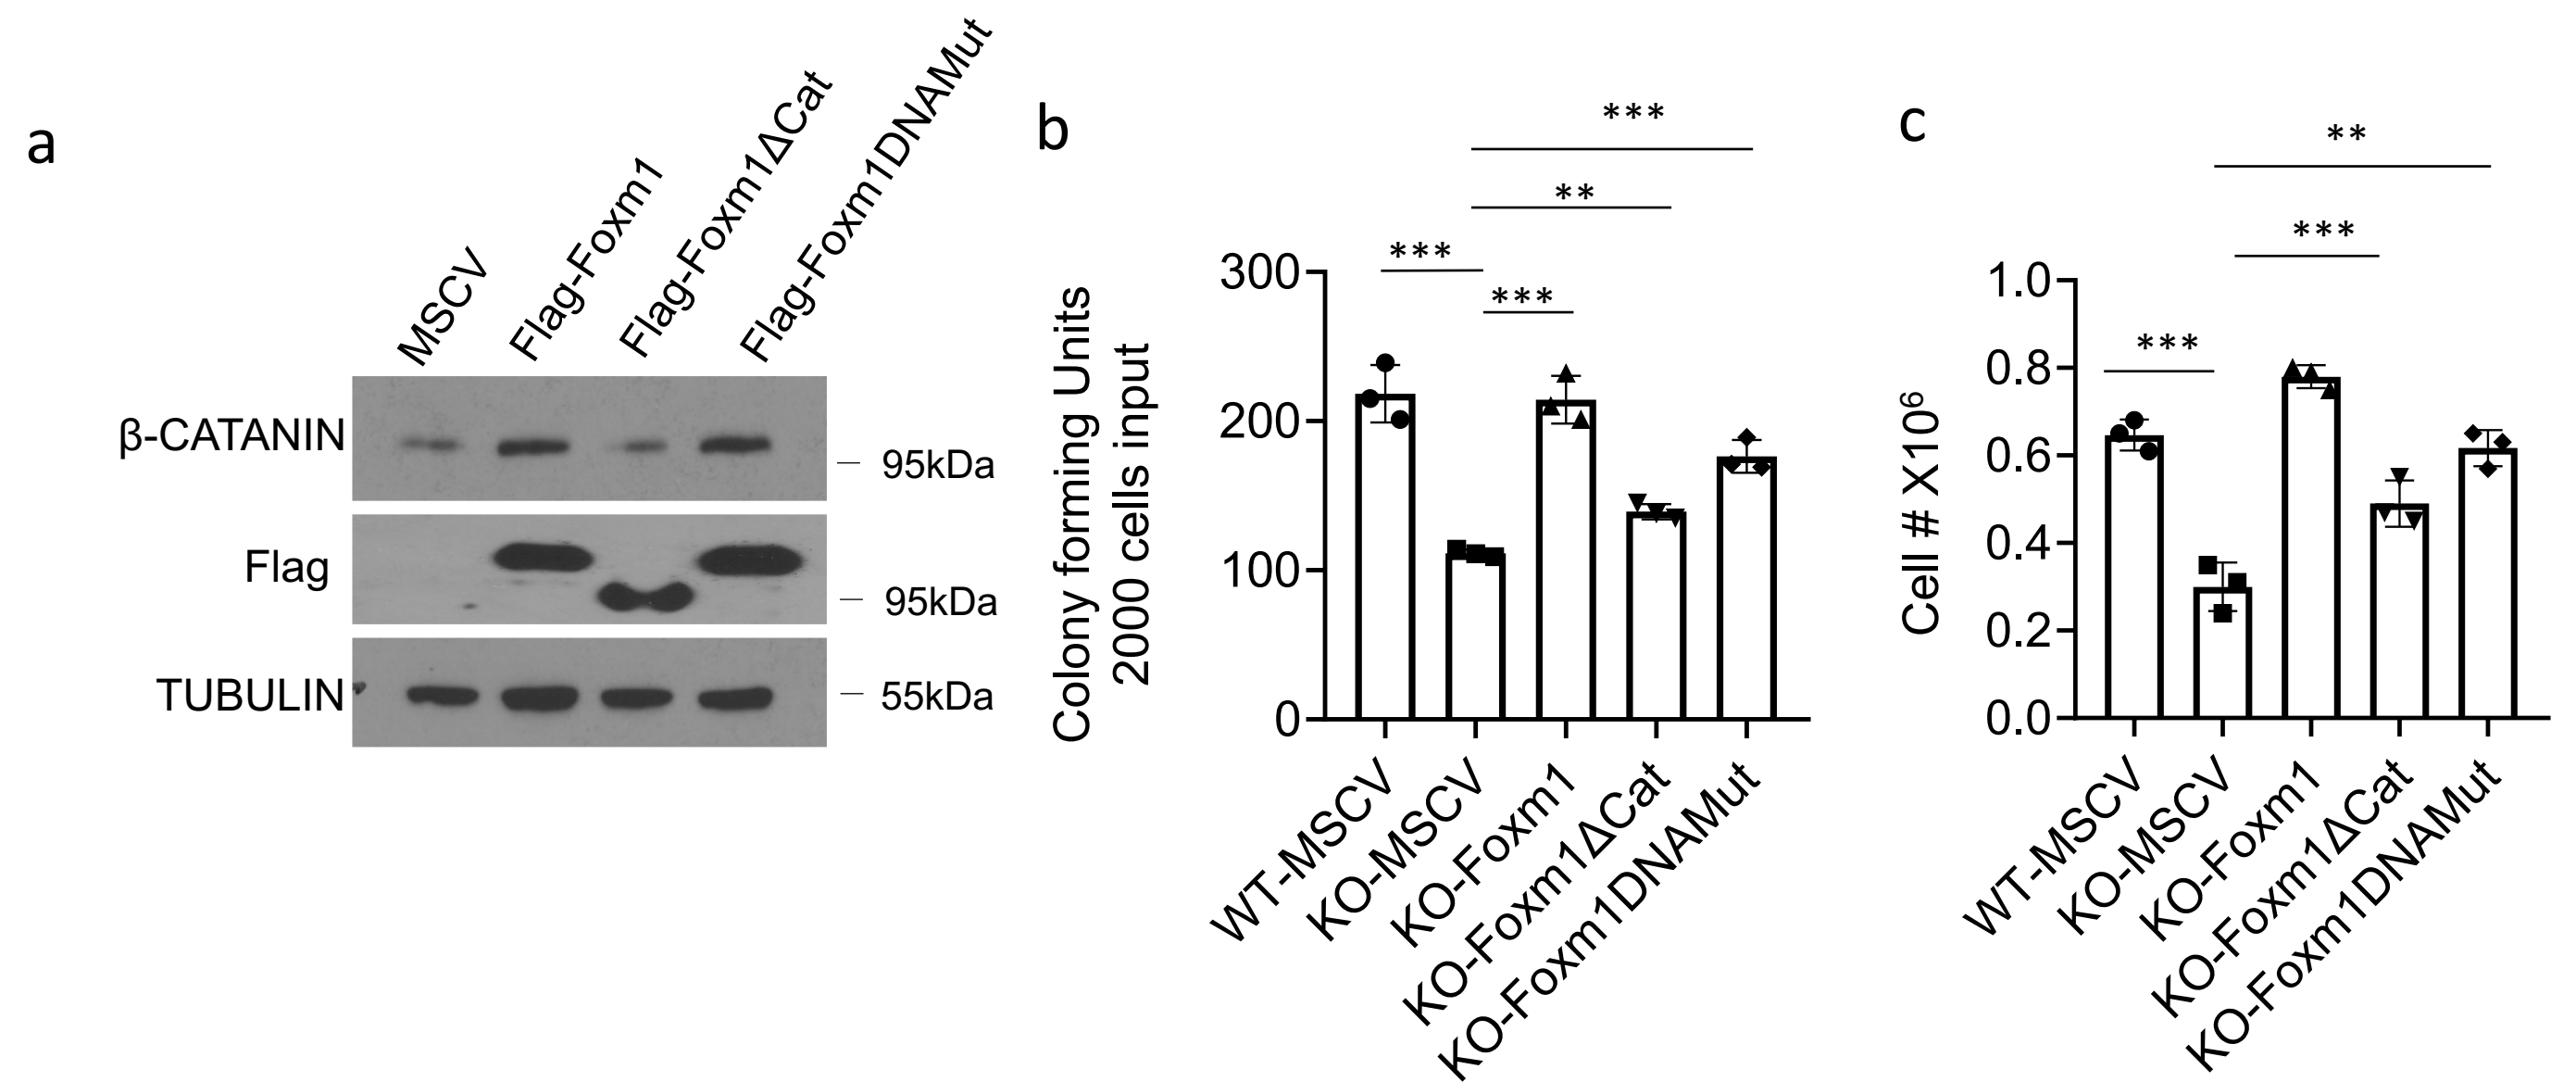

**Supplementary Fig. 8 Leukemogenic function of Foxm1 is largely dependent on interaction between Foxm1 and  $\beta$ -Catenin.**

(a) WB analysis of full length Foxm1, Foxm1 mutants as well as endogenous  $\beta$ -Catenin protein expression in MV4.11 cells expressing empty vector (MSCV), full length Foxm1 (Flag-Foxm1), Foxm1 deleted catenin interaction domain (Flag-Foxm1 $\Delta$ Cat) and Foxm1 DNA binding site mutant (Flag-Foxm1DNAMut) plasmids.

(b-c) Colony forming assay. MA9-WT cells infected with virus carrying MSCV empty vector and MA9-Foxm1-CKO cells infected with virus expressing empty vector (MSCV), full length Foxm1 (Flag-Foxm1), Flag-Foxm1 $\Delta$ Cat or Flag-Foxm1DNAMut vectors. were plated in plates containing methoCult™ medium and cytokines. The colony forming units (b) and total cells (c) were determined on each plate one week after plating. \*\* $p < 0.01$ ; \*\*\* $p < 0.001$ , mean  $\pm$  s.d., t-test. Source data are provided as a Source Data file.

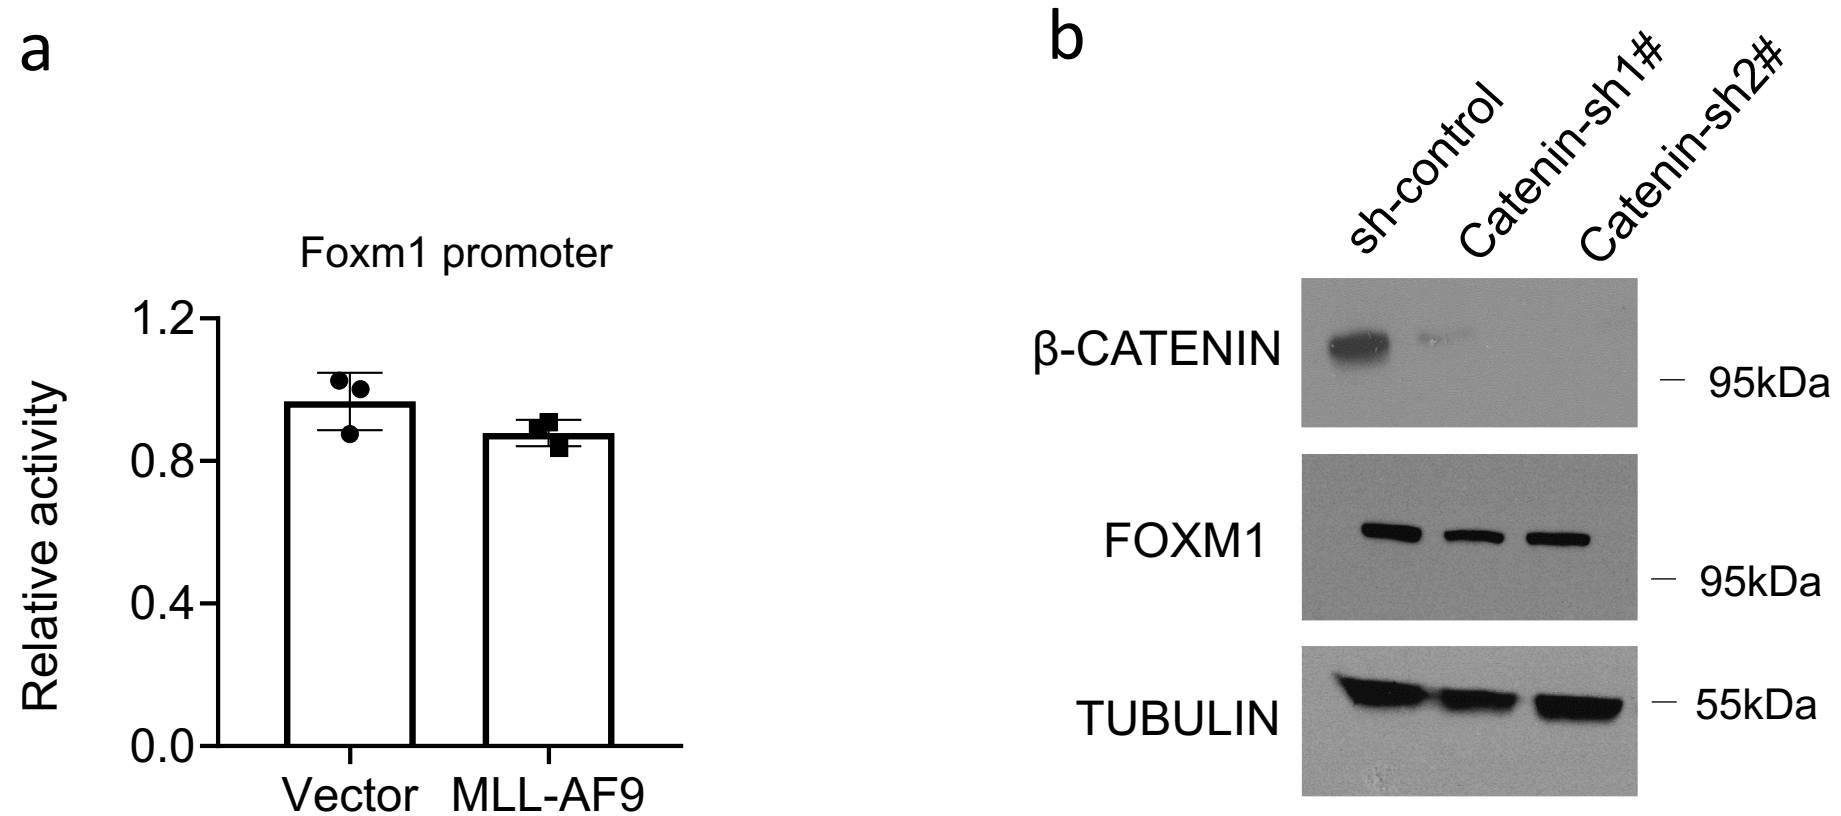

**Supplementary Fig. 9 MLL-AF9 does not control Foxm1 expression directly or through  $\beta$ -CATENIN.**

(a) Foxm1 promoter activity was evaluated in 293T cell by Dual-Luciferase reporter assay. Foxm1 promoter construct was co-transfected into 293T cells with either MSCV empty vector or MSCV-MLL-AF9, and phRL-SV40 vector as an internal control. After 48h, cells were lysed and promoter activity was determined by Dual-Luciferase assay.

(b) WB analysis of  $\beta$ -CATENIN and FOXM1 expression in MV4-11 expressing  $\beta$ -CATENIN-specific shRNAs or control vector. TUBULIN served as an internal control, mean  $\pm$  s.d., t-test. Source data are provided as a Source Data file.

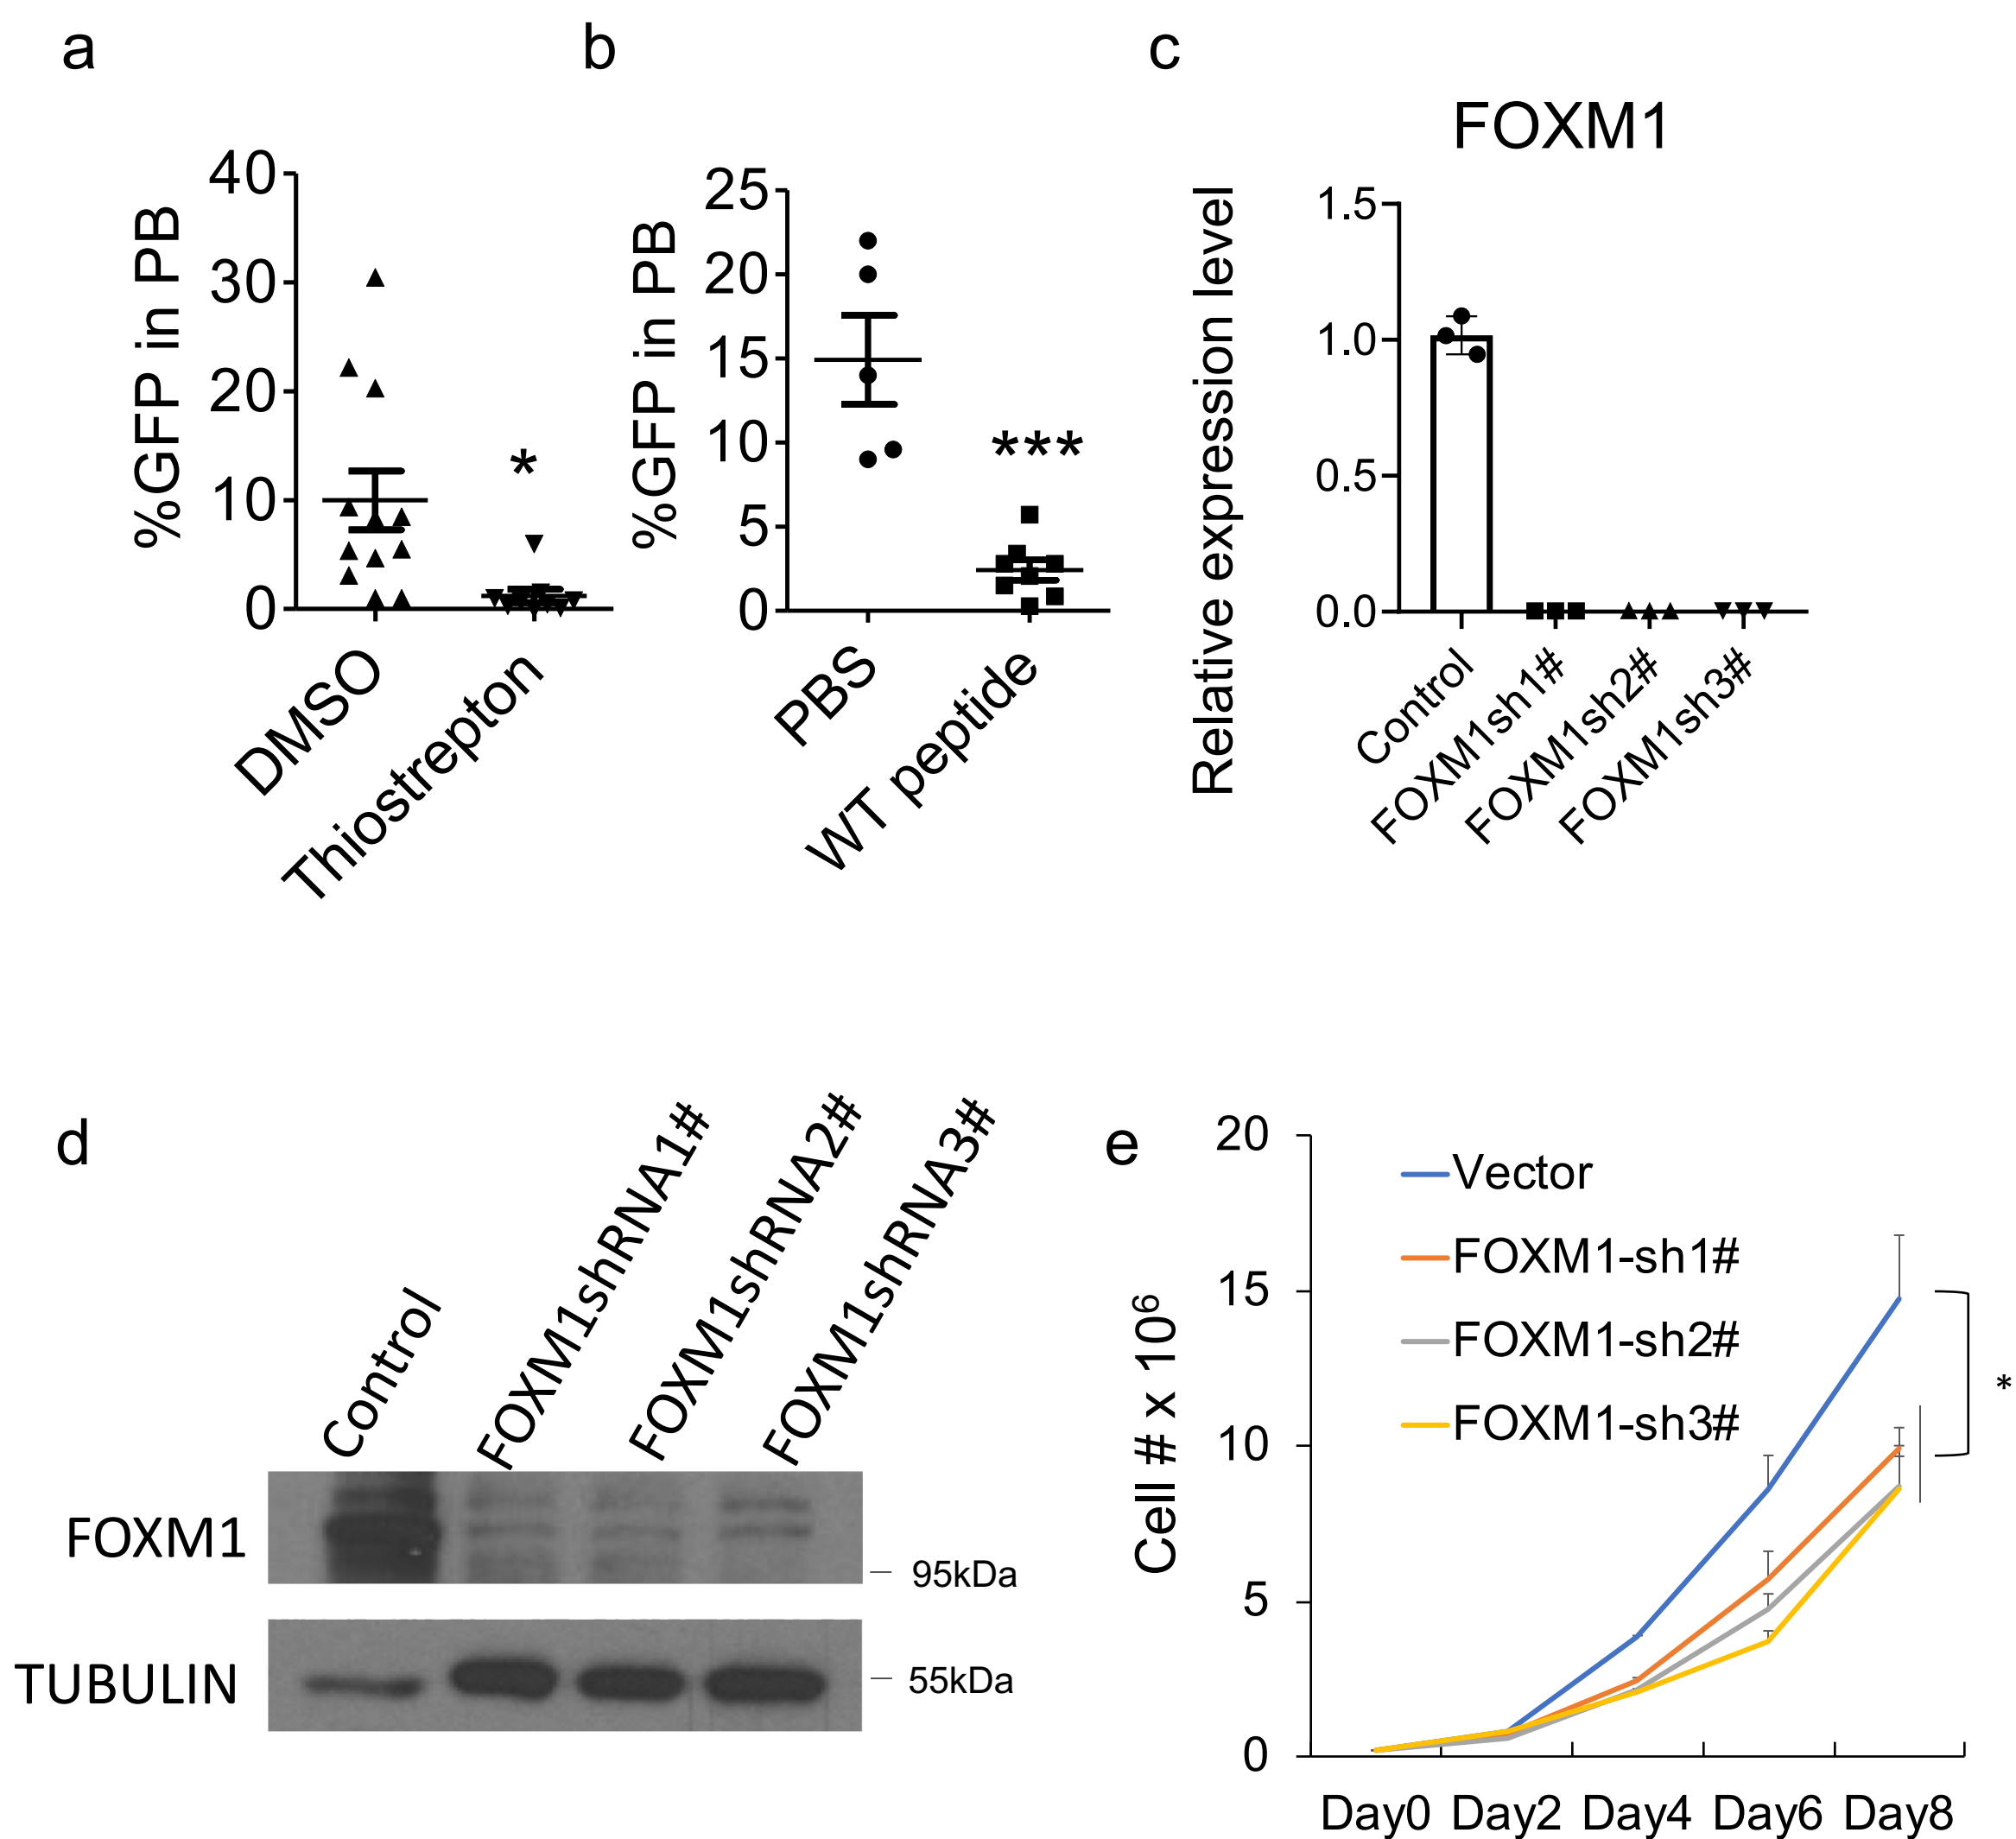

**Supplementary Fig. 10 Inhibition of FOXM1 suppressed leukemogenic potential of MLL-rearranged leukemia cells in vitro and in vivo.**

(a) Flow cytometric analysis of GFP percentage in PB cells collected from xenografted mice reconstituted with GFP labeled MV4-11 cells. The mice were treated with Thiostrepton (n=9 mice) or vehicle PBS (n=12 mice).

(b) Flow cytometric analysis of GFP percentage in PB cells collected from xenografted mice reconstituted with GFP labeled MV4-11 cells. The mice were treated with WT peptide (n=8 mice) or vehicle PBS (n=5 mice).

(c-d) Relative FOXM1 expression was determined by qRT-PCR (c) or West Blot analysis (d) in MV4-11 infected with inducible PLKO.1-Tet-on FOXM1-shRNA or control vector. 2  $\mu$ g/ml doxycycline was added in the medium to induce shRNA expression for 2 days.

(e) Growth of MV4-11 cells infected with inducible PLKO.1-Tet-on FOXM1-shRNA or control vector. 2  $\mu$ g/ml doxycycline was added in the medium to induce shRNA expression and cells were counted every two days. \*p < 0.05, \*\*\*p < 0.001, mean  $\pm$  s.d., t-test. Source data are provided as a Source Data file.

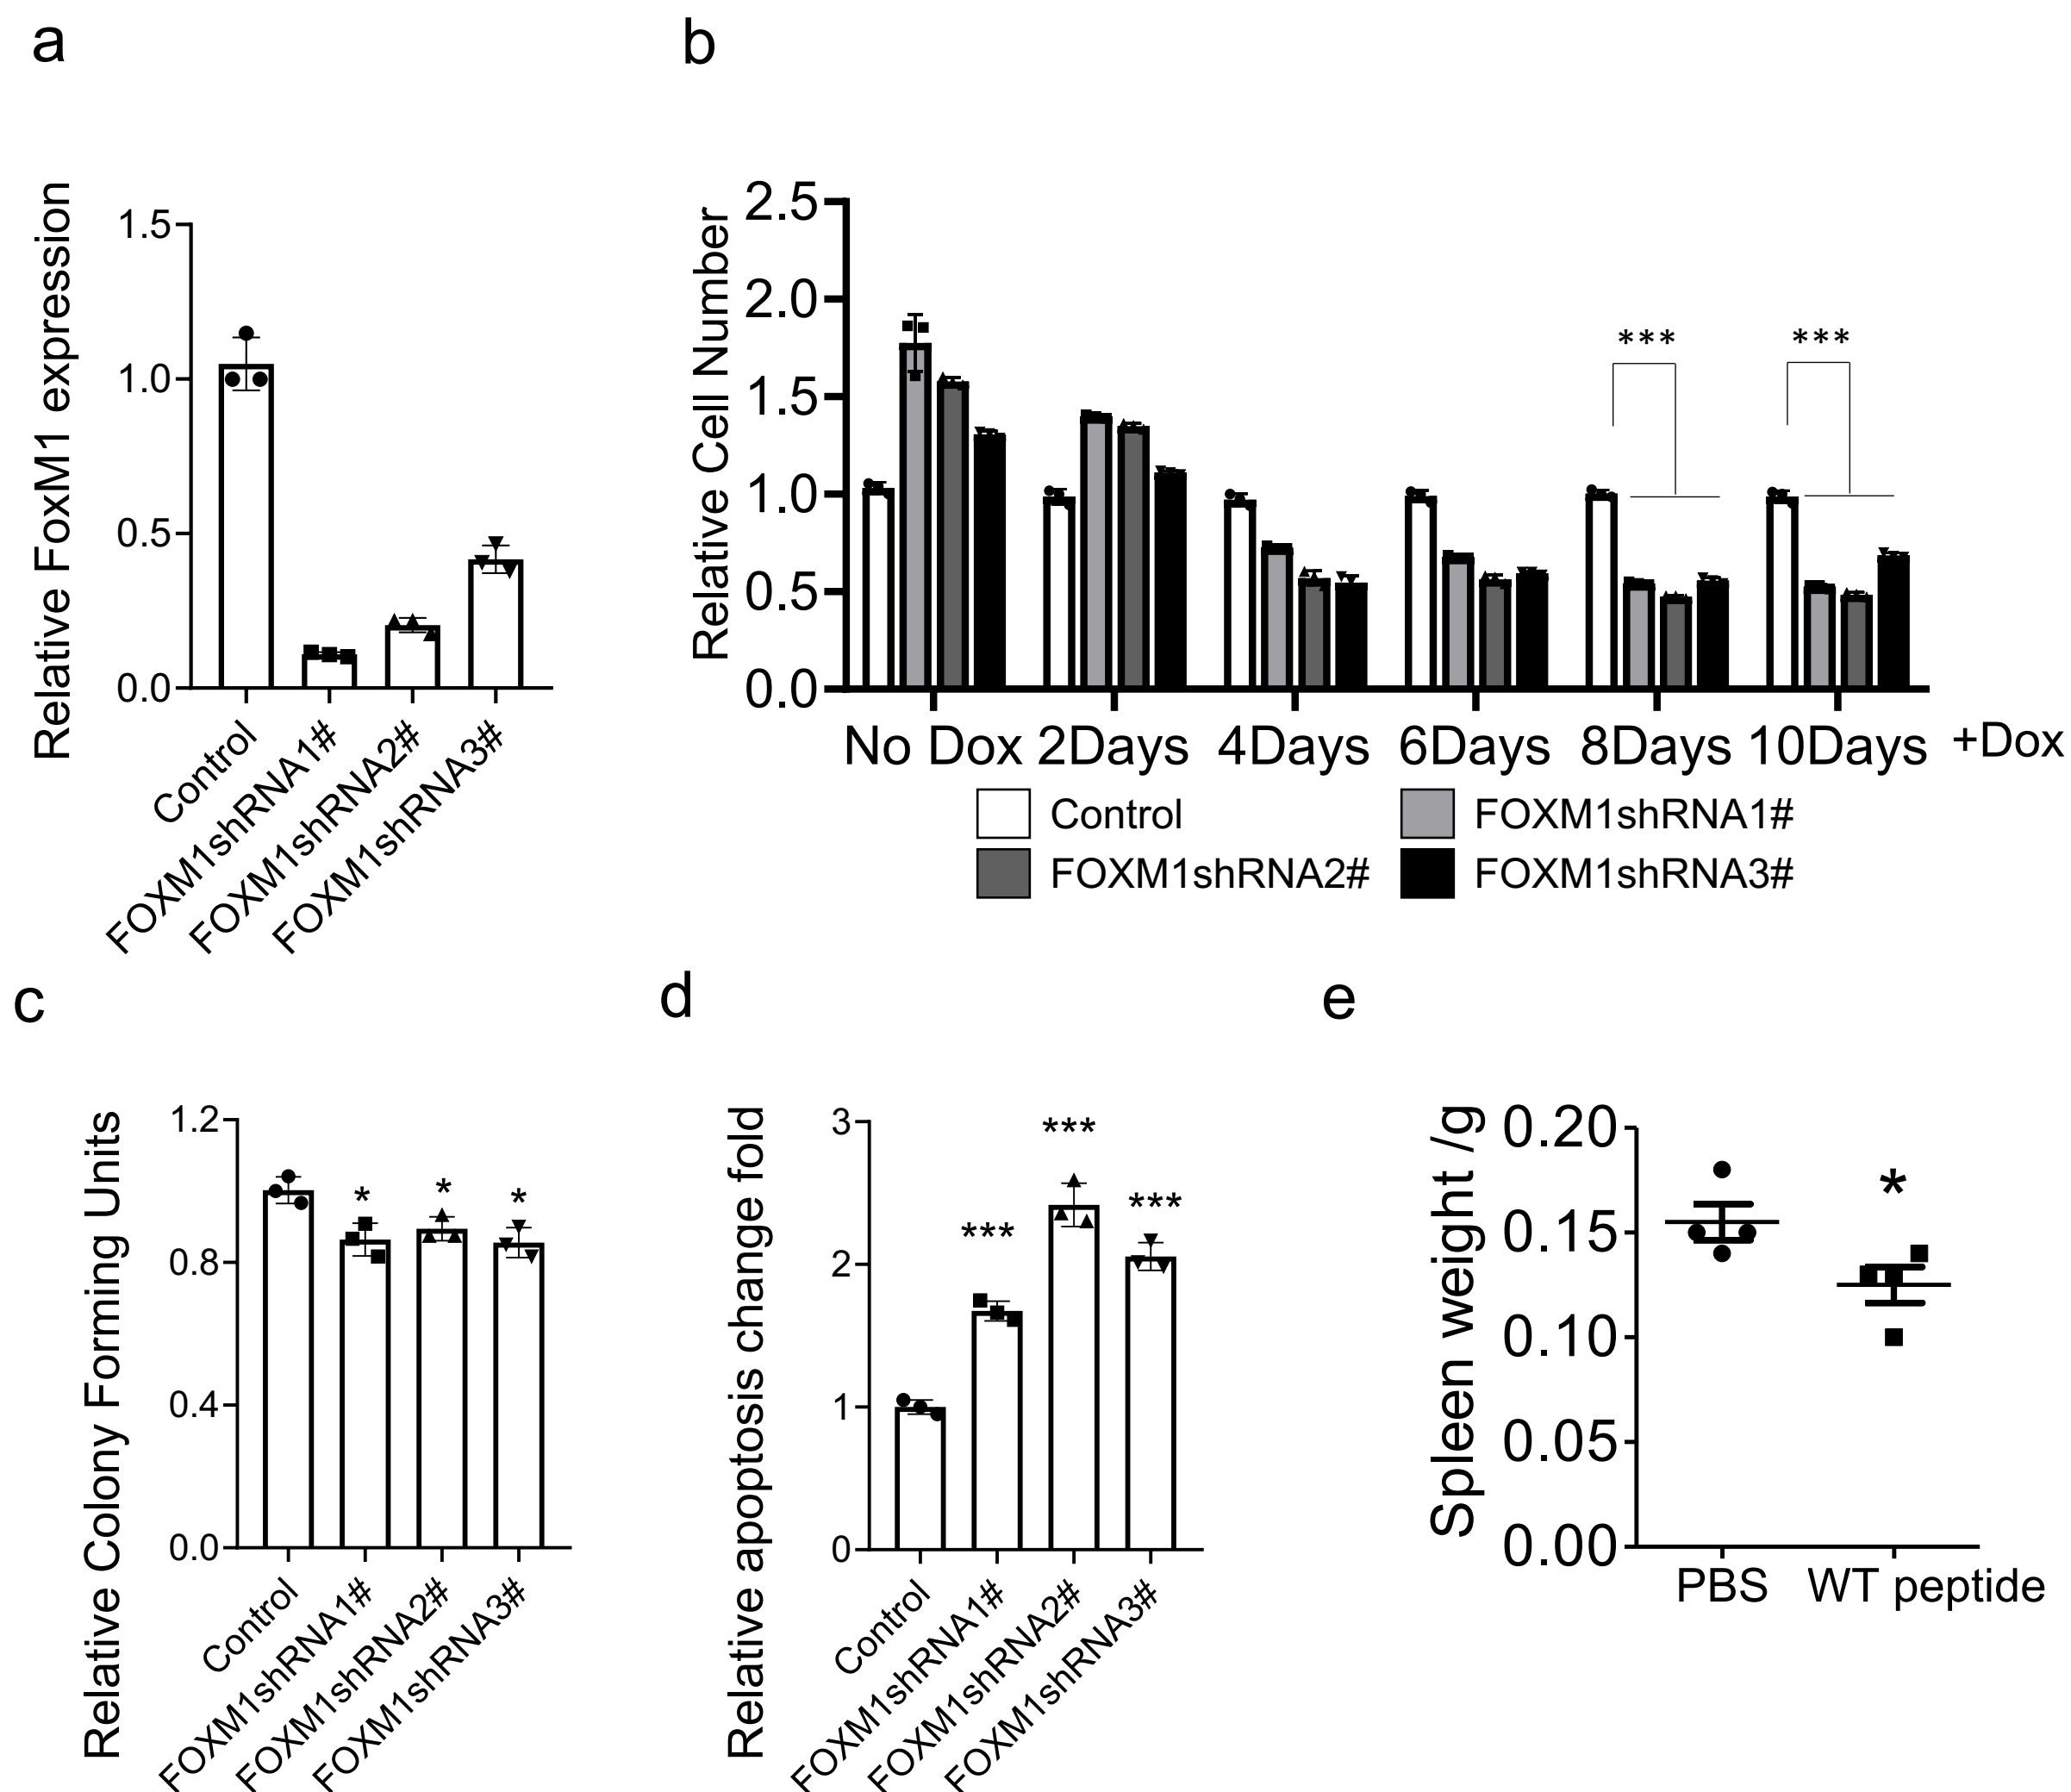

**Supplementary Fig. 11 Inhibition of FOXM1 suppressed MA9-transformed CD34<sup>+</sup> stem/progenitor cells and primary LSCs from patients in vitro and in vivo.**

(a) Relative expression of FOXM1 was determined by qRT-PCR in MA9.3 cells infected with inducible PLKO.1-Tet-on FOXM1-shRNA or control vector. 2  $\mu$ g/ml doxycycline was added in the medium to induce shRNA expression for 2 days.

(b) Growth rate of MA9.3 cells infected with inducible PLKO.1-Tet-on FOXM1-shRNA or control vector. 2  $\mu$ g/ml doxycycline was added in the medium to induce shRNA expression and cells were counted every two days.

(c) Colony forming assay for MA9.3 cells infected with inducible PLKO.1-Tet-on FOXM1-shRNA or control vector. 2  $\mu$ g/ml doxycycline was added in the methylcellulose medium to induce shRNA expression.

(d) Flow cytometric analysis of apoptotic MA9.3 cells infected with inducible PLKO.1-Tet-on FOXM1-shRNA or control vector. 2  $\mu$ g/ml doxycycline was added in the medium to induce shRNA expression for 2 days.

(e) Spleen weight for PDX mice. The mice were treated with WT peptide or vehicle PBS, n=4 mice for each group. \*p < 0.05, \*\*\*p < 0.001, mean  $\pm$  s.d., t-test. Source data are provided as a Source Data file.

## Supplementary Table 1 Patient karyotype informarion

|                     | Resource                  | Barcode  | Cell Type | Sex    | karyotype                                                        |
|---------------------|---------------------------|----------|-----------|--------|------------------------------------------------------------------|
| Human: MLL-r AML 1# | Children's Oncology Group | #20727   | BM        | Male   | 46,XY,t(9;11)(p22;q23)[17]/46,XX[3]                              |
| Human: MLL-r AML 2# | Northwestern University   | #17-0047 | BM        | Female | 46,XX,t(9;11)(p22;q23)[20]                                       |
| Human: MLL-r AML 3# | Northwestern University   | #15-1756 | BM        | Female | 51,XX,+6,+8,t(9;11)(p22;q23),+der(9)t(9;11)(p22;q23),+14,+19[18] |

## Supplementary Table 2 Primer list

|                           |                                                                 |                                                                                       |
|---------------------------|-----------------------------------------------------------------|---------------------------------------------------------------------------------------|
| Primers for subclone      |                                                                 |                                                                                       |
| Luciferase-XhoI-F         | CCGCTCGAGATGGATTACAAGGATGACGACGATAAGATGGAA<br>GATGCCAAAAACAT    |                                                                                       |
| Luciferase-EcoR1-R        | CCGGAATTCTTACACGGCGATCTTGCCGC                                   | construct luciferase in to PIG vector                                                 |
| hFoxM1-sh1-F              | CCGGGCCAATCGTTCTCTGACAGAACTCGAGTTCTGTCAGA<br>GAACGATTGGCTTTTTG  |                                                                                       |
| hFoxM1-sh1-R              | AATTCAAAAAGCCAATCGTTCTCTGACAGAACTCGAGTTCTGT<br>CAGAGAACGATTGGC  | construct human FOXM1 shRNA<br>into PLKO.1-Tet on vector                              |
| hFoxM1-sh2-F              | CCGGGCCCCAACAGGAGTCTAATCAACTCGAGTTGATTAGACT<br>CCTGTTGGGCTTTTTG |                                                                                       |
| hFoxM1-sh2-R              | AATTCAAAAAGCCCAACAGGAGTCTAATCAACTCGAGTTGATT<br>AGACTCCTGTTGGGC  | construct human FOXM1 shRNA<br>into PLKO.1-Tet on vector                              |
| hFoxM1-sh3-F              | CCGTTGCAGGGTGGTCCGTGTAACTCGAGTTTACACGGA<br>CCACCCTGCAATTTTTG    |                                                                                       |
| hFoxM1-sh3-R              | AATTCAAAAATTGCAGGGTGGTCCGTGTAACTCGAGTTTACA<br>CGGACCACCCTGCAA   | construct human FOXM1 shRNA<br>into PLKO.1-Tet on vector                              |
| Primers for real-time PCR |                                                                 |                                                                                       |
| m-RT-FoxM1-F              | CACTTGGATTGAGGACCACTT                                           |                                                                                       |
| m-RT-FoxM1-R              | GTCGTTTCTGCTGTGATT                                              | Detect mouse FoxM1 mRNA levels                                                        |
| m-RT-Nurr1-F              | GTTTACCCTCGAAGCCGAAGAG                                          |                                                                                       |
| m-RT-Nurr1-R              | ATAGTCAGGGTTTGCCTGGAAC                                          | Detect mouse Nurr1 mRNA levels                                                        |
| m-RT-P21-F                | TGACCCACAGCAGAAGAG                                              |                                                                                       |
| m-RT-P21-R                | ACCAGCCTGACAGATTTCTA                                            | Detect mouse P21 mRNA levels                                                          |
| m-RT-P27-F                | TGGACCAATGCCTGACTC                                              |                                                                                       |
| m-RT-P27-R                | GGGAACCGTCTGAAACATTTTC                                          | Detect moues P27 mRNA levels                                                          |
| m-RT-Beta Actin-F         | TGTGATGGTGGGAATGGGTCAG                                          |                                                                                       |
| m-RT-Beta Actin-R         | TTTGATGTCACGCACGATTTCC                                          | Detect mouse Beta-actin mRNA<br>levels                                                |
| m-RT-Bcl2-F               | TTGTGGCCTTCTTTGAGTTCCGGTG                                       |                                                                                       |
| m-RT-Bcl2-R               | CTTCAGAGACAGCCAGGAGAAATC                                        | Detect moues Bcl2 mRNA levels                                                         |
| m-RT-Caspase 6-F          | CCAGACAGACAAGCTGGACA                                            |                                                                                       |
| m-RT-Caspase 6-R          | TGTACCAGGAGCCATTCACA                                            | Detect moues Caspase 6 mRNA<br>levels                                                 |
| m-RT-Caspase 7-F          | CCGAGTGCCCACTTATCTGT                                            |                                                                                       |
| m-RT-Caspase 7-R          | ACCTGTCGCTTTGTCGAAGT                                            | Detect moues Caspase 7 mRNA<br>levels                                                 |
| m-RT-c-Myc-F              | CTGGATTTCTTTGGGCGTT                                             |                                                                                       |
| m-RT-c-Myc-R              | TGGTGAAGTTCACGTTGAGGG                                           | Detect moues c-Myc mRNA levels                                                        |
| m-RT-beta-Catenin-F       | CCGTTTCGCCTTCATTATGGA                                           |                                                                                       |
| m-RT-beta-Catenin-R       | GGCAAGGTTTCGAATCAATCC                                           | Detect moues beta-Catenin mRNA<br>levels                                              |
| h-RT-FOXM1-F              | TTAAGCACATTGCCAAGCCA                                            |                                                                                       |
| h-RT-FOXM1-R              | GGGGTGAATGGTCCAGAAGGA                                           | Detect human FOXM1 mRNA<br>levels                                                     |
| h-RT-Beta ACTIN-F         | GCACAGAGCCTCGCCTT                                               |                                                                                       |
| h-RT-Beta ACTIN-R         | GTTGTCGACGACGAGCG                                               | Detect human Beta ACTIN mRNA<br>levels                                                |
| Primers for Genotyping    |                                                                 |                                                                                       |
| FoxM1 GT1                 | TGGCTTCCCAGCAGTACAAATC                                          | TG1+TG2: Detect the FoxM1flox<br>allele (280 bp) and FoxM1wildtype<br>allele (226 bp) |
| FoxM1 GT2                 | TGCTTACAAAAGACACACTTGGACG                                       |                                                                                       |
| FoxM1 GT3                 | TCTCGCTCAATTCCAAGACCAG                                          | TG1+TG3: Detect deleted FoxM1<br>allele (400 bp)                                      |
| Cre1                      | CTGCATTACCGGTGCGATGCAAC                                         |                                                                                       |
| Cre2                      | GCATTGCTGTCACTTGGTTCGTG                                         | Detect Cre allele (301bp), both Tie2<br>and Mx1 Cre                                   |
