# Supplementary material for: FOXM1 regulates leukemia stem cell quiescence and survival in MLL-rearranged AML
Source: PubMed Central journal article supplement (PMC7026046; doi:10.1038/s41467-020-14590-9), 2020-02-17
Supplement: 41467_2020_14590_MOESM2_ESM.pdf [file 41467_2020_14590_MOESM2_ESM.pdf]

## Reporting Summary

Nature Research wishes to improve the reproducibility of the work that we publish. This form provides structure for consistency and transparency in reporting. For further information on Nature Research policies, see [Authors & Referees](#) and the [Editorial Policy Checklist](#).

### Statistics

For all statistical analyses, confirm that the following items are present in the figure legend, table legend, main text, or Methods section.

n/a Confirmed

- |                                     |                                     |                                                                                                                                                                                                                                                            |
|-------------------------------------|-------------------------------------|------------------------------------------------------------------------------------------------------------------------------------------------------------------------------------------------------------------------------------------------------------|
| <input type="checkbox"/>            | <input checked="" type="checkbox"/> | The exact sample size ( $n$ ) for each experimental group/condition, given as a discrete number and unit of measurement                                                                                                                                    |
| <input type="checkbox"/>            | <input checked="" type="checkbox"/> | A statement on whether measurements were taken from distinct samples or whether the same sample was measured repeatedly                                                                                                                                    |
| <input type="checkbox"/>            | <input checked="" type="checkbox"/> | The statistical test(s) used AND whether they are one- or two-sided<br><i>Only common tests should be described solely by name; describe more complex techniques in the Methods section.</i>                                                               |
| <input checked="" type="checkbox"/> | <input type="checkbox"/>            | A description of all covariates tested                                                                                                                                                                                                                     |
| <input checked="" type="checkbox"/> | <input type="checkbox"/>            | A description of any assumptions or corrections, such as tests of normality and adjustment for multiple comparisons                                                                                                                                        |
| <input type="checkbox"/>            | <input checked="" type="checkbox"/> | A full description of the statistical parameters including central tendency (e.g. means) or other basic estimates (e.g. regression coefficient) AND variation (e.g. standard deviation) or associated estimates of uncertainty (e.g. confidence intervals) |
| <input checked="" type="checkbox"/> | <input type="checkbox"/>            | For null hypothesis testing, the test statistic (e.g. $F$ , $t$ , $r$ ) with confidence intervals, effect sizes, degrees of freedom and $P$ value noted<br><i>Give <math>P</math> values as exact values whenever suitable.</i>                            |
| <input checked="" type="checkbox"/> | <input type="checkbox"/>            | For Bayesian analysis, information on the choice of priors and Markov chain Monte Carlo settings                                                                                                                                                           |
| <input checked="" type="checkbox"/> | <input type="checkbox"/>            | For hierarchical and complex designs, identification of the appropriate level for tests and full reporting of outcomes                                                                                                                                     |
| <input checked="" type="checkbox"/> | <input type="checkbox"/>            | Estimates of effect sizes (e.g. Cohen's $d$ , Pearson's $r$ ), indicating how they were calculated                                                                                                                                                         |

*Our web collection on [statistics for biologists](#) contains articles on many of the points above.*

### Software and code

Policy information about [availability of computer code](#)

|                 |                                                                                                                                                                                                                                                                                           |
|-----------------|-------------------------------------------------------------------------------------------------------------------------------------------------------------------------------------------------------------------------------------------------------------------------------------------|
| Data collection | The IVIS signal data was collected by Living Image (Caliper Life Science) software. Flow cytometric data was collected by Summit Version 4.3. RNA-seq was collected from Illumina HiSeq 3000 system.                                                                                      |
| Data analysis   | The IVIS signal data was analyzed by Living Image (Caliper Life Science) software. Flow cytometric data was analyzed by FlowJo Version 10. Gene set enrichment analysis was performed with GSEA v2.0 software. Statistical analyses were performed by Microsoft Excel or GraphPad Prism 5 |

For manuscripts utilizing custom algorithms or software that are central to the research but not yet described in published literature, software must be made available to editors/reviewers. We strongly encourage code deposition in a community repository (e.g. GitHub). See the Nature Research [guidelines for submitting code & software](#) for further information.

### Data

Policy information about [availability of data](#)

All manuscripts must include a [data availability statement](#). This statement should provide the following information, where applicable:

- Accession codes, unique identifiers, or web links for publicly available datasets
- A list of figures that have associated raw data
- A description of any restrictions on data availability

The accession numbers for the RNA-Seq data is PRJNA515914 at NCBI SRA.

## Field-specific reporting

Please select the one below that is the best fit for your research. If you are not sure, read the appropriate sections before making your selection.

- Life sciences     Behavioural & social sciences     Ecological, evolutionary & environmental sciences

For a reference copy of the document with all sections, see [nature.com/documents/nr-reporting-summary-flat.pdf](https://www.nature.com/documents/nr-reporting-summary-flat.pdf)

## Life sciences study design

All studies must disclose on these points even when the disclosure is negative.

|                 |                                                                                                                                                                                                                                                                                                                                                   |
|-----------------|---------------------------------------------------------------------------------------------------------------------------------------------------------------------------------------------------------------------------------------------------------------------------------------------------------------------------------------------------|
| Sample size     | The sample sizes were not predetermined by statistical method. For characterization of mice phenotypes, 3-7 mice were used for each group. For the other experiments for drug treatment, survival curve analysis, 3-15 mice were used for experiments. The specific number of mice used for each experiments were indicated in the figure legend. |
| Data exclusions | The recipient mice which failed to reconstitute hematopoietic system and died within 12 days after lethally-irradiated were excluded for survival analysis in the experiments in which recipient mice will be used.                                                                                                                               |
| Replication     | All the experiments were performed in triplicate for each individual sample, and the results were reproduced in 3-5 independent experiments.                                                                                                                                                                                                      |
| Randomization   | The xenograft or recipient mice were randomly assigned to the experiment groups for treatment or without treatment of FOXM1 inhibitors or other drugs. Mice sex and age were kept controlled for each experiment.                                                                                                                                 |
| Blinding        | Investigator were not blinded to group allocation during data collection and analysis.                                                                                                                                                                                                                                                            |

## Reporting for specific materials, systems and methods

We require information from authors about some types of materials, experimental systems and methods used in many studies. Here, indicate whether each material, system or method listed is relevant to your study. If you are not sure if a list item applies to your research, read the appropriate section before selecting a response.

### Materials & experimental systems

| n/a                                 | Involved in the study                                           |
|-------------------------------------|-----------------------------------------------------------------|
| <input type="checkbox"/>            | <input checked="" type="checkbox"/> Antibodies                  |
| <input type="checkbox"/>            | <input checked="" type="checkbox"/> Eukaryotic cell lines       |
| <input checked="" type="checkbox"/> | <input type="checkbox"/> Palaeontology                          |
| <input type="checkbox"/>            | <input checked="" type="checkbox"/> Animals and other organisms |
| <input checked="" type="checkbox"/> | <input type="checkbox"/> Human research participants            |
| <input checked="" type="checkbox"/> | <input type="checkbox"/> Clinical data                          |

### Methods

| n/a                                 | Involved in the study                              |
|-------------------------------------|----------------------------------------------------|
| <input checked="" type="checkbox"/> | <input type="checkbox"/> ChIP-seq                  |
| <input type="checkbox"/>            | <input checked="" type="checkbox"/> Flow cytometry |
| <input checked="" type="checkbox"/> | <input type="checkbox"/> MRI-based neuroimaging    |

## Antibodies

### Antibodies used

beta-CATENIN BD Biosciences Cat#: 610153, RRID: AB\_397554  
 beta-TUBULIN Millipore Cat# 05-661, RRID:AB\_309885  
 Ub Antibody (P4D1) Santa Cruz Biotechnology Cat# sc-8017, RRID: AB\_628423  
 FOXM1 Santa Cruz Biotechnology Cat#: SC-500, RRID: AB\_631521  
 FLAG Sigma-Aldrich Cat# F3165, RRID: AB\_259529  
 Streptavidin PE-Cy5 Thermo Fisher Scientific Cat# 15-4317-82, RRID: AB\_10116415  
 Mouse CD117 (c-Kit) APC-eFluor® 780 Thermo Fisher Scientific Cat# 47-1171-82, RRID: AB\_1272177  
 Mouse Ly-6A/E (Sca-1) Monoclonal Antibody (D7), PE Thermo Fisher Scientific Cat# 12-5981-83, RRID: AB\_466087  
 Annexin V Apoptosis Detection Kit APC Thermo Fisher Scientific Cat# 88-8007-74, RRID: AB\_2575166  
 Annexin V - Apoptosis stain antibody FITC BD Biosciences Cat# 556419, RRID: AB\_2665412  
 BrdU Monoclonal Antibody (BU20A), APC Thermo Fisher Scientific Cat# 17-5071-42, RRID: AB\_11040534  
 BrdU Monoclonal Antibody (BU20A), FITC Thermo Fisher Scientific Cat# 11-5071-42, RRID: AB\_11042627  
 Mouse CD16/CD32 PE-Cy7 Thermo Fisher Scientific Cat# 25-0161-82, RRID: AB\_469598  
 Mouse CD34 Monoclonal Antibody (RAM34), eFluor 660 Thermo Fisher Scientific Cat# 50-0341-82, RRID: AB\_10596826  
 Mouse CD117 (c-Kit) PE-Cy7 Thermo Fisher Scientific Cat# 25-1171-82, RRID: AB\_469644  
 Mouse Ly-6G (Gr-1) APC-eFluor 780 Thermo Fisher Scientific Cat# 47-5931-82, RRID: AB\_1518804  
 Mouse CD11b APC Thermo Fisher Scientific Cat# 17-0112-82, RRID: AB\_469343  
 Mouse Ly-6G (Gr-1), PE Thermo Fisher Scientific Cat# 12-5931-82, RRID:AB\_466045  
 Mouse CD71, PE Thermo Fisher Scientific Cat# 12-0711-82, RRID:AB\_465740  
 Mouse TER-119 APC Thermo Fisher Scientific Cat# 17-5921-82, RRID:AB\_469473  
 Mouse CD4 PE Thermo Fisher Scientific Cat# 12-0041-82, RRID:AB\_465506

Mouse CD8a APC Thermo Fisher Scientific Cat# 17-0081-81, RRID:AB\_469334  
 Mouse CD45 PE Thermo Fisher Scientific Cat# 12-0451-82, RRID:AB\_465668  
 Human CD45 APC Thermo Fisher Scientific Cat# 17-9459-42, RRID:AB\_10718532  
 Human CD34 APC Thermo Fisher Scientific Cat# 17-0349-41, RRID:AB\_2016604  
 Human CD38, PE Thermo Fisher Scientific Cat# 12-0389-41, RRID:AB\_10668491  
 Mouse CD3e Biotin Thermo Fisher Scientific Cat# 13-0033-86, RRID:AB\_842773  
 Mouse/Human CD45R (B220) Biotin Thermo Fisher Scientific Cat# 13-0452-86, RRID:AB\_466451  
 Mouse Ly-6G (Gr-1) Biotin Thermo Fisher Scientific Cat# 13-5931-86, RRID:AB\_466802  
 Mouse CD127 Biotin Thermo Fisher Scientific Cat# 13-1271-85, RRID:AB\_466589  
 Mouse CD19 Biotin Thermo Fisher Scientific Cat# 13-0193-86, RRID:AB\_657655  
 Mouse TER-119 Biotin Thermo Fisher Scientific Cat# 13-5921-85, RRID:AB\_466798  
 Rat IgM Isotype Control Biotin Thermo Fisher Scientific Cat# 13-4341-81, RRID:AB\_470086  
 Mouse CD34 eFluor 450 Thermo Fisher Scientific Cat# 48-0341-82, RRID:AB\_2043837  
 Anti-mouse IgG, HRP-linked Antibody Cell Signaling Technology Cat# 7076, RRID:AB\_330924  
 Anti-rabbit IgG, HRP-linked Antibody Cell Signaling Technology Cat# 7074, RRID:AB\_2099233

Validation

All primary antibodies were validated on manufacturer's website, related references and in our manuscript.

## Eukaryotic cell lines

Policy information about [cell lines](#)

Cell line source(s)

MV4-11 ATCC CRL-9591  
 RRID:CVCL\_0064  
 THP-1 ATCC TIB-202  
 RRID:CVCL\_0006  
 NOMO-1 DSMZ ACC-542  
 RRID:CVCL\_1609  
 K562 ATCC CCL-243  
 RRID:CVCL\_0004  
 Kasumi-1 ATCC CRL-2724  
 RRID:CVCL\_0589  
 Kasumi-3 ATCC CRL-2725  
 RRID:CVCL\_0612  
 HL-60 ATCC CCL-240  
 RRID:CVCL\_0002  
 U-937 ATCC CRL-1593.2  
 RRID:CVCL\_0007  
 UCSD-AML1 DSMZ ACC 691  
 RRID:CVCL\_1853  
 MA9.3 A gift from Drs. Benjamin Mizukawa and James C. Mulloy N/A  
 MA9.3RAS A gift from Drs. Benjamin Mizukawa and James C. Mulloy N/A  
 HEK293T ATCC CRL-3216  
 RRID:CVCL\_0063

Authentication

All leukemic cell lines were purchased from ATCC or DSMZ and were not authenticated by ourselves. Cell lines were expanded and cryogenically frozen upon acquisition to establish stocks in liquid nitrogen until use. The cell lines were cultured within 3 to 6 months after resuscitation.

Mycoplasma contamination

All cell lines have been tested for mycoplasma contamination by vendors.

Commonly misidentified lines  
(See [ICLAC](#) register)

None commonly misidentified cell lines were used.

## Animals and other organisms

Policy information about [studies involving animals](#); [ARRIVE guidelines](#) recommended for reporting animal research

Laboratory animals

6-8 weeks B6 mice and 8 weeks NSGS mice were used in our experiments, sex and age were matched when analysis were performed.

Wild animals

The study did not involve wild animals.

Field-collected samples

No samples were collected from field.

Ethics oversight

All animal research was approved by the University of Florida and University of Illinois at Chicago Institutional Animal Care and Use Committee.

Note that full information on the approval of the study protocol must also be provided in the manuscript.

## Flow Cytometry

### Plots

Confirm that:

- The axis labels state the marker and fluorochrome used (e.g. CD4-FITC).
- The axis scales are clearly visible. Include numbers along axes only for bottom left plot of group (a 'group' is an analysis of identical markers).
- All plots are contour plots with outliers or pseudocolor plots.
- A numerical value for number of cells or percentage (with statistics) is provided.

### Methodology

Sample preparation

Suspended single cell was prepared from bone marrow, spleen and peripheral blood. Red cells were lysed by ACK LYSING Buffer (VWR) before staining. Cells were incubated with antibodies in FACS buffer (2%FBS in PBS) on ice for 20 minutes at dark. All antibodies were listed in KEY RESOURCES TABLE. Anti-Gr-1, Ter119, B220, CD19, IgM, CD127, CD3e antibodies are lineage markers, streptavidin-PE-Cy5, anti-Sca1, c-Kit, CD34 and CD16,32 antibodies are for leukemic stem cell L-GMP population analysis. Anti-cKit and Gr1 are for "K+G-" cKit+ Gr1- population analysis. For cell quiescence (G0 population) staining, BM cells were incubated with 5 µg/ml Hoechst for 45 min at 37°C, and then 1 µg/ml Pyronin Y was added to incubate at 37 °C for another 15 min. Furthermore, cells were stained with lineage cocktail, and then the cells were stained with LGMP or K+G- markers. For the detection of apoptosis, BM cells were stained with cell surface markers first, Annexin V staining was followed in its specific binding buffer, and DAPI was added at last. For BrdU cell cycle staining in vivo, 100 µl of 10 mg/ml BrdU was injected by i.p. and after 24 hours, mice were sacrificed, and BM cells were collected. After staining the cell surface markers, BM cells were fixed and permeabilized by Cytofix/Cytoperm buffer (BD Pharmingen), followed 1 hour DNase I digestion. Then cells were washed and stained with anti-BrdU antibodies at RT for 20 minutes in dark. After adding 1mg/ml DAPI, cells are ready to analyze. All cells were analyzed by Flow cytometry on CyAn bench-top analyzer (Beckman Coulter).

Instrument

All cells were analyzed by Flow cytometry on CyAn bench-top analyzer (Beckman Coulter), sorted by MoFlo Astrios cell sorter.

Software

Flow cytometric data was collected by Summit Version 4.3 and analyzed by FlowJo Version 10.

Cell population abundance

Live cell > 95%, determined by DAPI negative in total BM cells. In leukemia mice, frequency of Lin- was increased up to 20-30%, frequency of c-Kit+Sca1- in Lin- is about 5%-10%. The frequency of each population in mice was shown in the representative diagrams in the figure or supplementary data.

Gating strategy

Anti-Gr-1, Ter119, B220, CD19, IgM, CD127, CD3e antibodies are lineage markers, streptavidin-PE-Cy5, anti-Sca1, c-Kit, CD34 and CD16,32 antibodies are for leukemic stem cell L-GMP population analysis, gating strategy was Lin-c-Kit+Sca1-CD34+FcR-γ+. Anti-cKit and Gr1 are for "K+G-" cKit+ Gr1- population analysis. For cell quiescence (G0 population) staining, BM cells were stained Hoechst and PyroninY, and then the cells were stained with LGMP or K+G- markers, PyroninY and Hoechst double negative is G0. For the detection of apoptosis, BM cells were stained with cell surface markers first, Annexin V staining was followed, and DAPI was added at last, Annexin V positive cells are apoptotic cells. For BrdU cell cycle staining in vivo, after staining the cell surface markers, BM cells were fixed and permeabilized by Cytofix/Cytoperm buffer (BD Pharmingen), followed 1 hour DNase I digestion. Then cells were washed and stained with anti-BrdU antibodies at RT for 20 minutes in dark. After adding 1mg/ml DAPI, cells are ready to analyze, BrdU positive population are S phase. All gating strategy are shown in figures.

- Tick this box to confirm that a figure exemplifying the gating strategy is provided in the Supplementary Information.
